# Supplementary material
Source: publisher site journal article supplement (https://www.degruyterbrill.com/publication/isbn/9783110645743/downloadAsset/9783110645743_Testmaterialien_KT-DEU.zip)
Supplement: Supplementary file 1 [file Mathieu_et_al_2020_KT-DEU_Bewertungsbogen.pdf › Werthmann_KT-DEU/Mathieu_et_al_2020_KT-DEU_Bewertungsbogen.pdf]

Jennipher Mathieu, Antonina Werthmann, Katrin Lindner

# **Sprachentwicklungstest zum Kasus bei bilingualen Vorschulkindern: Sprachstand Deutsch (KT-DEU)**

## **Bewertungsbogen**

|                                      |       |
|--------------------------------------|-------|
| Code des Probanden                   | _____ |
| Geburtsdatum                         | _____ |
| Geschlecht                           | _____ |
| Kontaktzeit zu L2 (in Monaten)       | _____ |
| Alter zum Testzeitpunkt (in Monaten) | _____ |
| Code des Versuchsleiters             | _____ |
| Datum der Testdurchführung           | _____ |
| Ort der Testdurchführung             | _____ |
| Name der Audiodatei                  | _____ |
| Name der Transkriptionsdatei         | _____ |

| Bild   | Elizitierte Struktur | Antwort* | Bewertung der realisierten Struktur** | Bemerkungen |
|--------|----------------------|----------|---------------------------------------|-------------|
| Bild 1 | PP <sub>DAT</sub>    |          |                                       |             |
|        | PP <sub>AKK</sub>    |          |                                       |             |
|        | NP <sub>AKK</sub>    |          |                                       |             |
| Bild 3 | NP <sub>DAT</sub>    |          |                                       |             |
|        | NP <sub>AKK</sub>    |          |                                       |             |
| Bild 4 | NP <sub>AKK</sub>    |          |                                       |             |
|        | NP <sub>AKK</sub>    |          |                                       |             |
|        | NP <sub>AKK</sub>    |          |                                       |             |
| Bild 5 | NP <sub>AKK</sub>    |          |                                       |             |
|        | PP <sub>DAT</sub>    |          |                                       |             |
|        | PP <sub>AKK</sub>    |          |                                       |             |
| Bild 6 | PP <sub>DAT</sub>    |          |                                       |             |
|        | PP <sub>DAT</sub>    |          |                                       |             |
|        | PP <sub>DAT</sub>    |          |                                       |             |
| Bild 7 | PP <sub>DAT</sub>    |          |                                       |             |
|        | PP <sub>AKK</sub>    |          |                                       |             |
|        | PP <sub>AKK</sub>    |          |                                       |             |
|        | PP <sub>DAT</sub>    |          |                                       |             |
| Bild 8 | PP <sub>DAT</sub>    |          |                                       |             |
|        | PP <sub>DAT</sub>    |          |                                       |             |
|        | PP <sub>DAT</sub>    |          |                                       |             |

| Bild    | Elizitierte Struktur | Antwort* | Bewertung der realisierten Struktur** | Bemerkungen |
|---------|----------------------|----------|---------------------------------------|-------------|
| Bild 9  | NP <sub>AKK</sub>    |          |                                       |             |
|         | PP <sub>DAT</sub>    |          |                                       |             |
| Bild 10 | PP <sub>DAT</sub>    |          |                                       |             |
|         | PP <sub>DAT</sub>    |          |                                       |             |
| Bild 11 | ADV/Partikelverb     |          |                                       |             |
| Bild 12 | PP <sub>DAT</sub>    |          |                                       |             |
|         | PP <sub>DAT</sub>    |          |                                       |             |
| Bild 13 | PP <sub>DAT</sub>    |          |                                       |             |
|         | NP <sub>DAT</sub>    |          |                                       |             |
| Bild 14 | NP <sub>DAT</sub>    |          |                                       |             |
|         | NP <sub>AKK</sub>    |          |                                       |             |
| Bild 15 | NP <sub>AKK</sub>    |          |                                       |             |
|         | PP <sub>AKK</sub>    |          |                                       |             |
|         | NP <sub>AKK</sub>    |          |                                       |             |

| Bild                                                         | Elizitierte Struktur | Antwort* | Bewertung der realisierten Struktur** | Bemerkungen |
|--------------------------------------------------------------|----------------------|----------|---------------------------------------|-------------|
| Bild 16                                                      | NP <sub>DAT</sub>    |          |                                       |             |
|                                                              | NP <sub>AKK</sub>    |          |                                       |             |
|                                                              | NP <sub>DAT</sub>    |          |                                       |             |
| Bild 17                                                      | NP <sub>DAT</sub>    |          |                                       |             |
|                                                              | NP <sub>AKK</sub>    |          |                                       |             |
| Bild 18                                                      | NP <sub>DAT</sub>    |          |                                       |             |
|                                                              | NP <sub>AKK</sub>    |          |                                       |             |
| Gesamtzahl der zielsprachlich realisierten NP-/PP-Strukturen |                      |          |                                       | ___/42      |

\* Die Phrasenstrukturen in den Antworten können je nach dem Kontext variieren.

\*\* Vorschlag zur Bewertung der realisierten Struktur: zielsprachlich (zs), nicht zielsprachlich (nzs), nicht versprachlicht (nv), deiktische Substitution (ds, z. B. *das da*, *da*, *hier* statt z. B. *den Kuchen*, *auf dem Tisch*, *hinter dem Sofa*). Ferner kann der Typ der nicht zielsprachlichen NP-/PP-Realisierung notiert werden, z. B. Ersetzung (ERS) – etwa bei Akkusativ für Dativ –, Artikelausschluss (ARTO), Ersetzung der Präposition in der PP (ERS PRP) oder ihre Auslassung (PRPO)
