# Supplementary material
Source: publisher site journal article supplement (https://www.degruyterbrill.com/publication/isbn/9783110645743/downloadAsset/9783110645743_Testmaterialien_KT-DEU.zip)
Supplement: Supplementary file 2 [file Mathieu_et_al_2020_KT-DEU_Bildergeschichte.pdf › Werthmann_KT-DEU/Mathieu_et_al_2020_KT-DEU_Bildergeschichte.pdf]

Jennipher Mathieu, Antonina Werthmann, Katrin Lindner

# Sprachentwicklungstest zum Kasus bei bilingualen Vorschulkindern: Sprachstand Deutsch (KT-DEU)

Bildergeschichte

## **Geschichte von einem Hund und einer Katze**

gemalt von Jennipher Mathieu

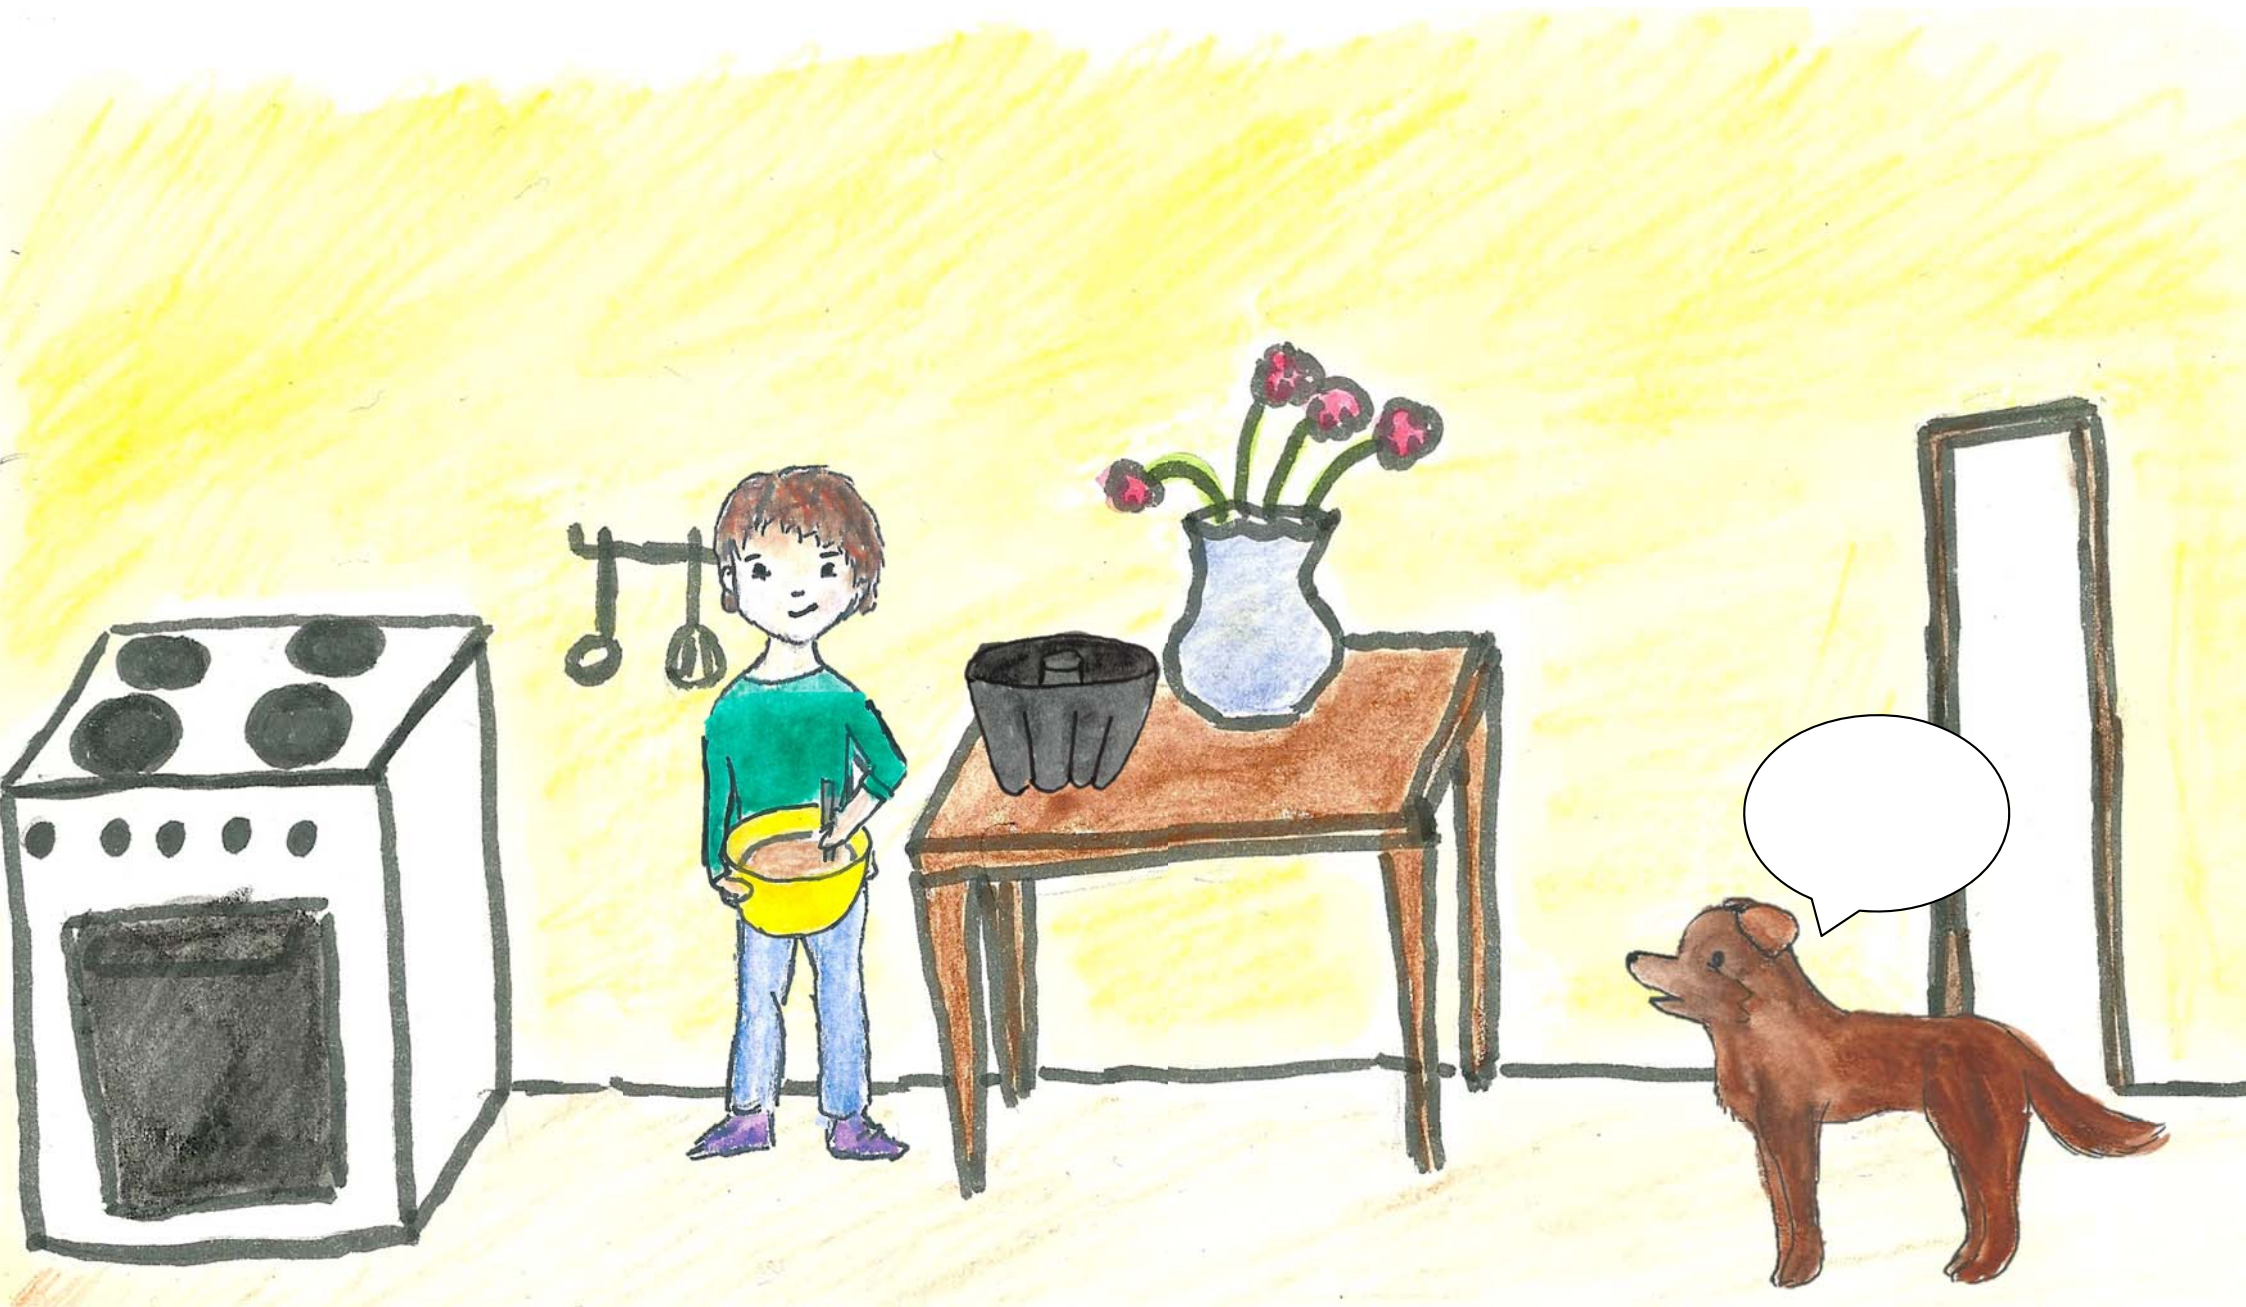

**VL:** Was ist denn hier los? (kurze Pause) Da ist ein Junge. Der steht in der Küche. Und hier ist ein Hund. Und dieser Hund, der spielt soooo gerne. Der sagt zu dem Jungen: Spiel ...

Wenn Kind nicht reagiert, **VL:** Ich denke, der sagt: Spiel mit mir!



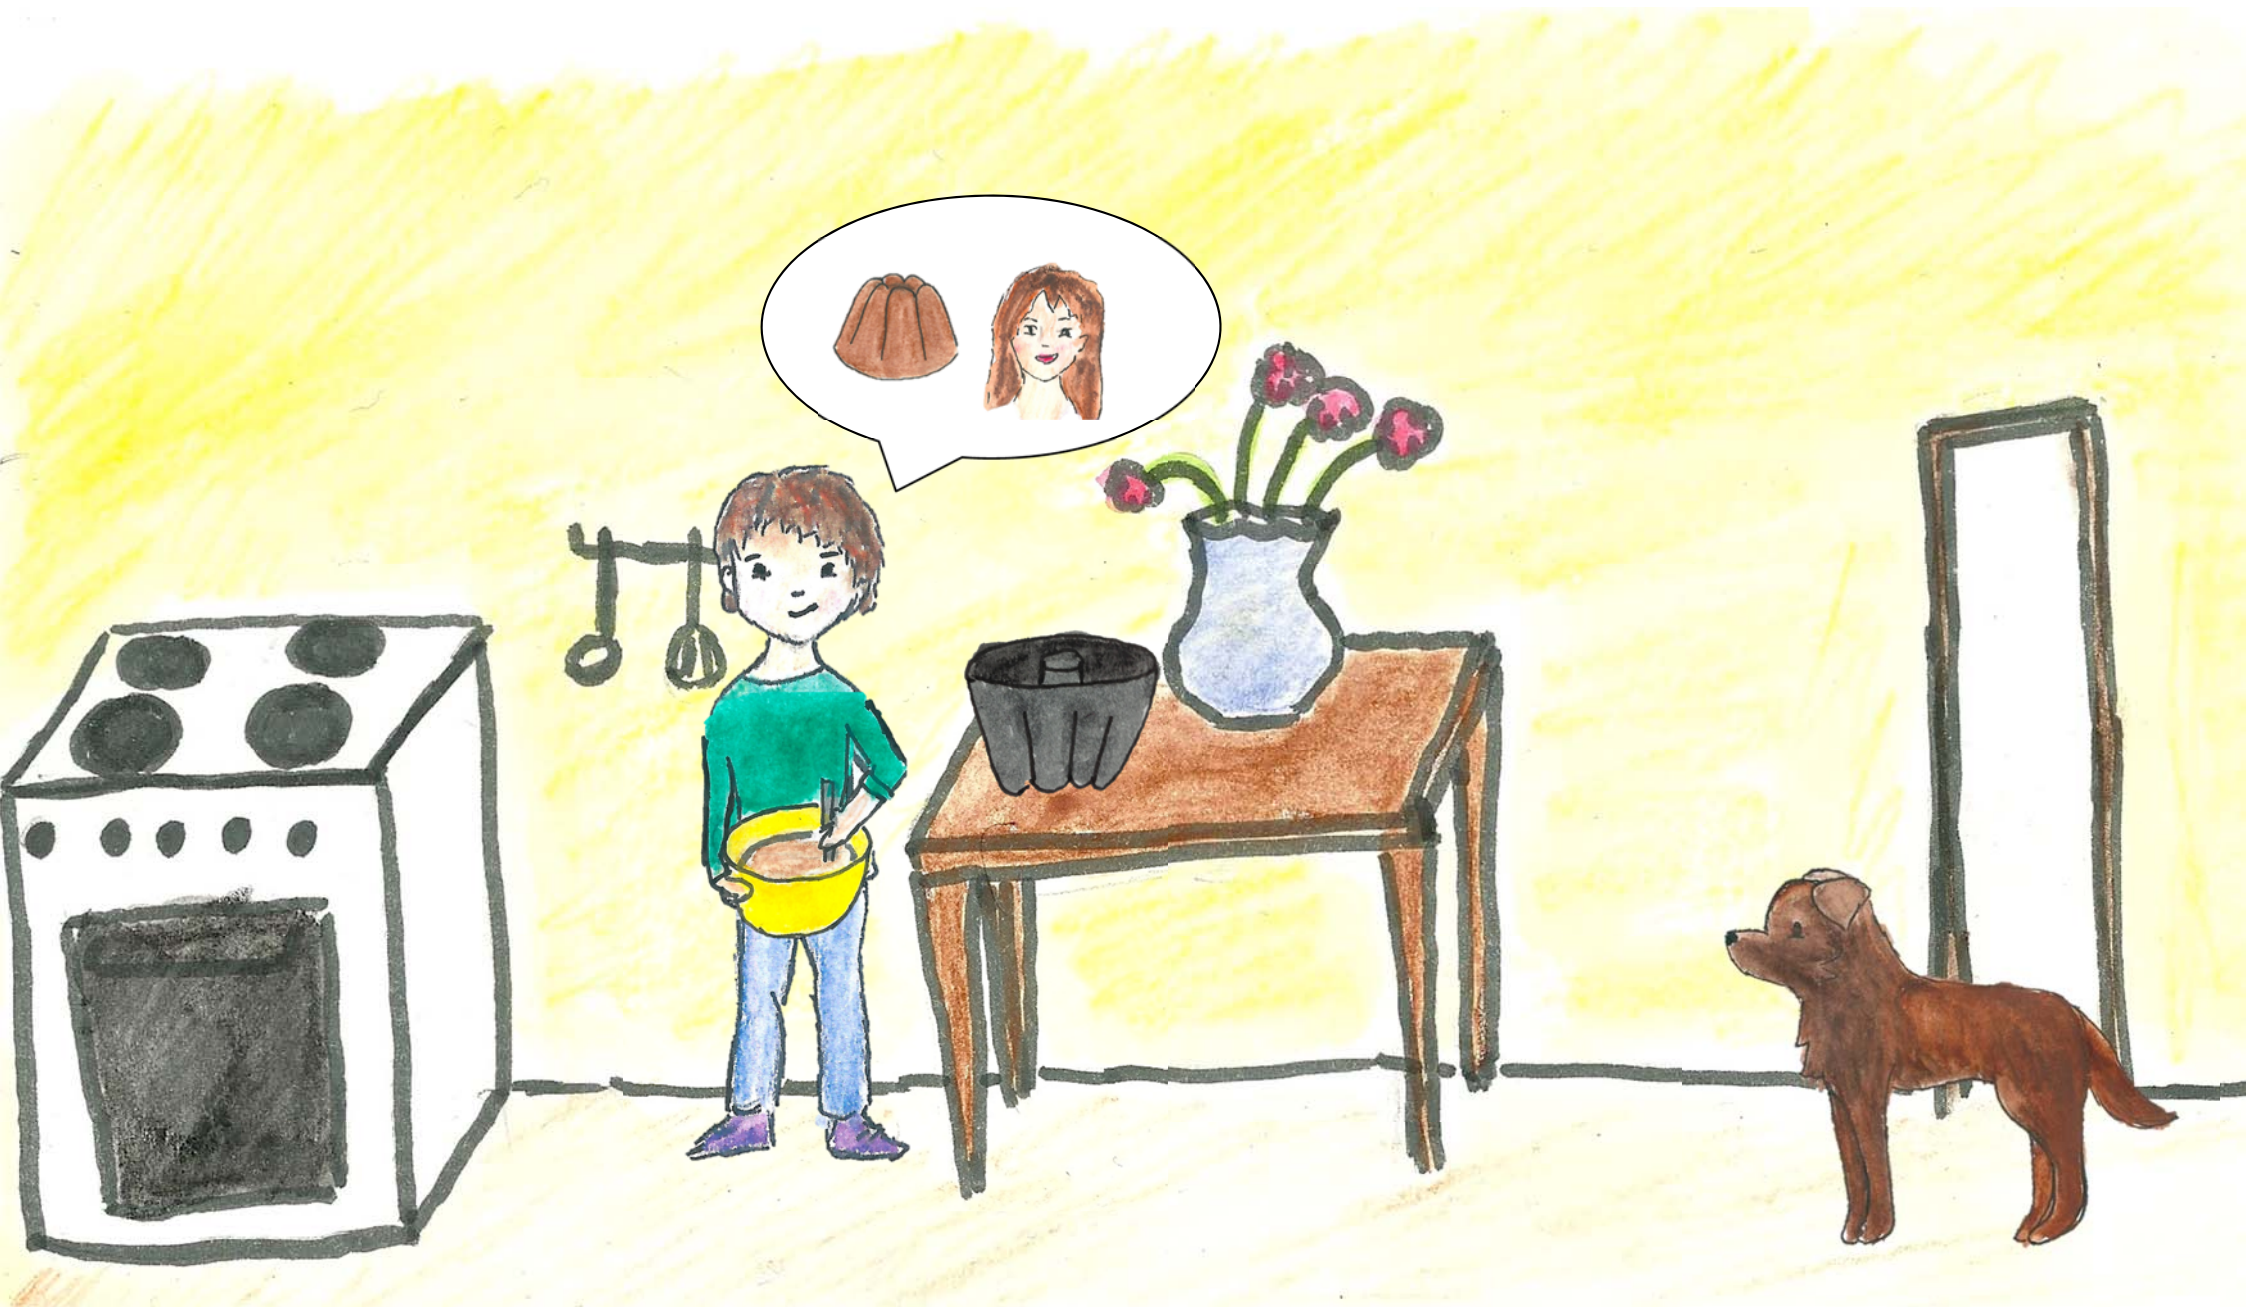

**VL:** Und was sagt jetzt der Junge? Der sagt: „Nein, ich hab keine Zeit. Ich kann jetzt nicht. Meine Mama hat heute Geburtstag. Ich backe ...  
**P:** Für wen ist der Kuchen?



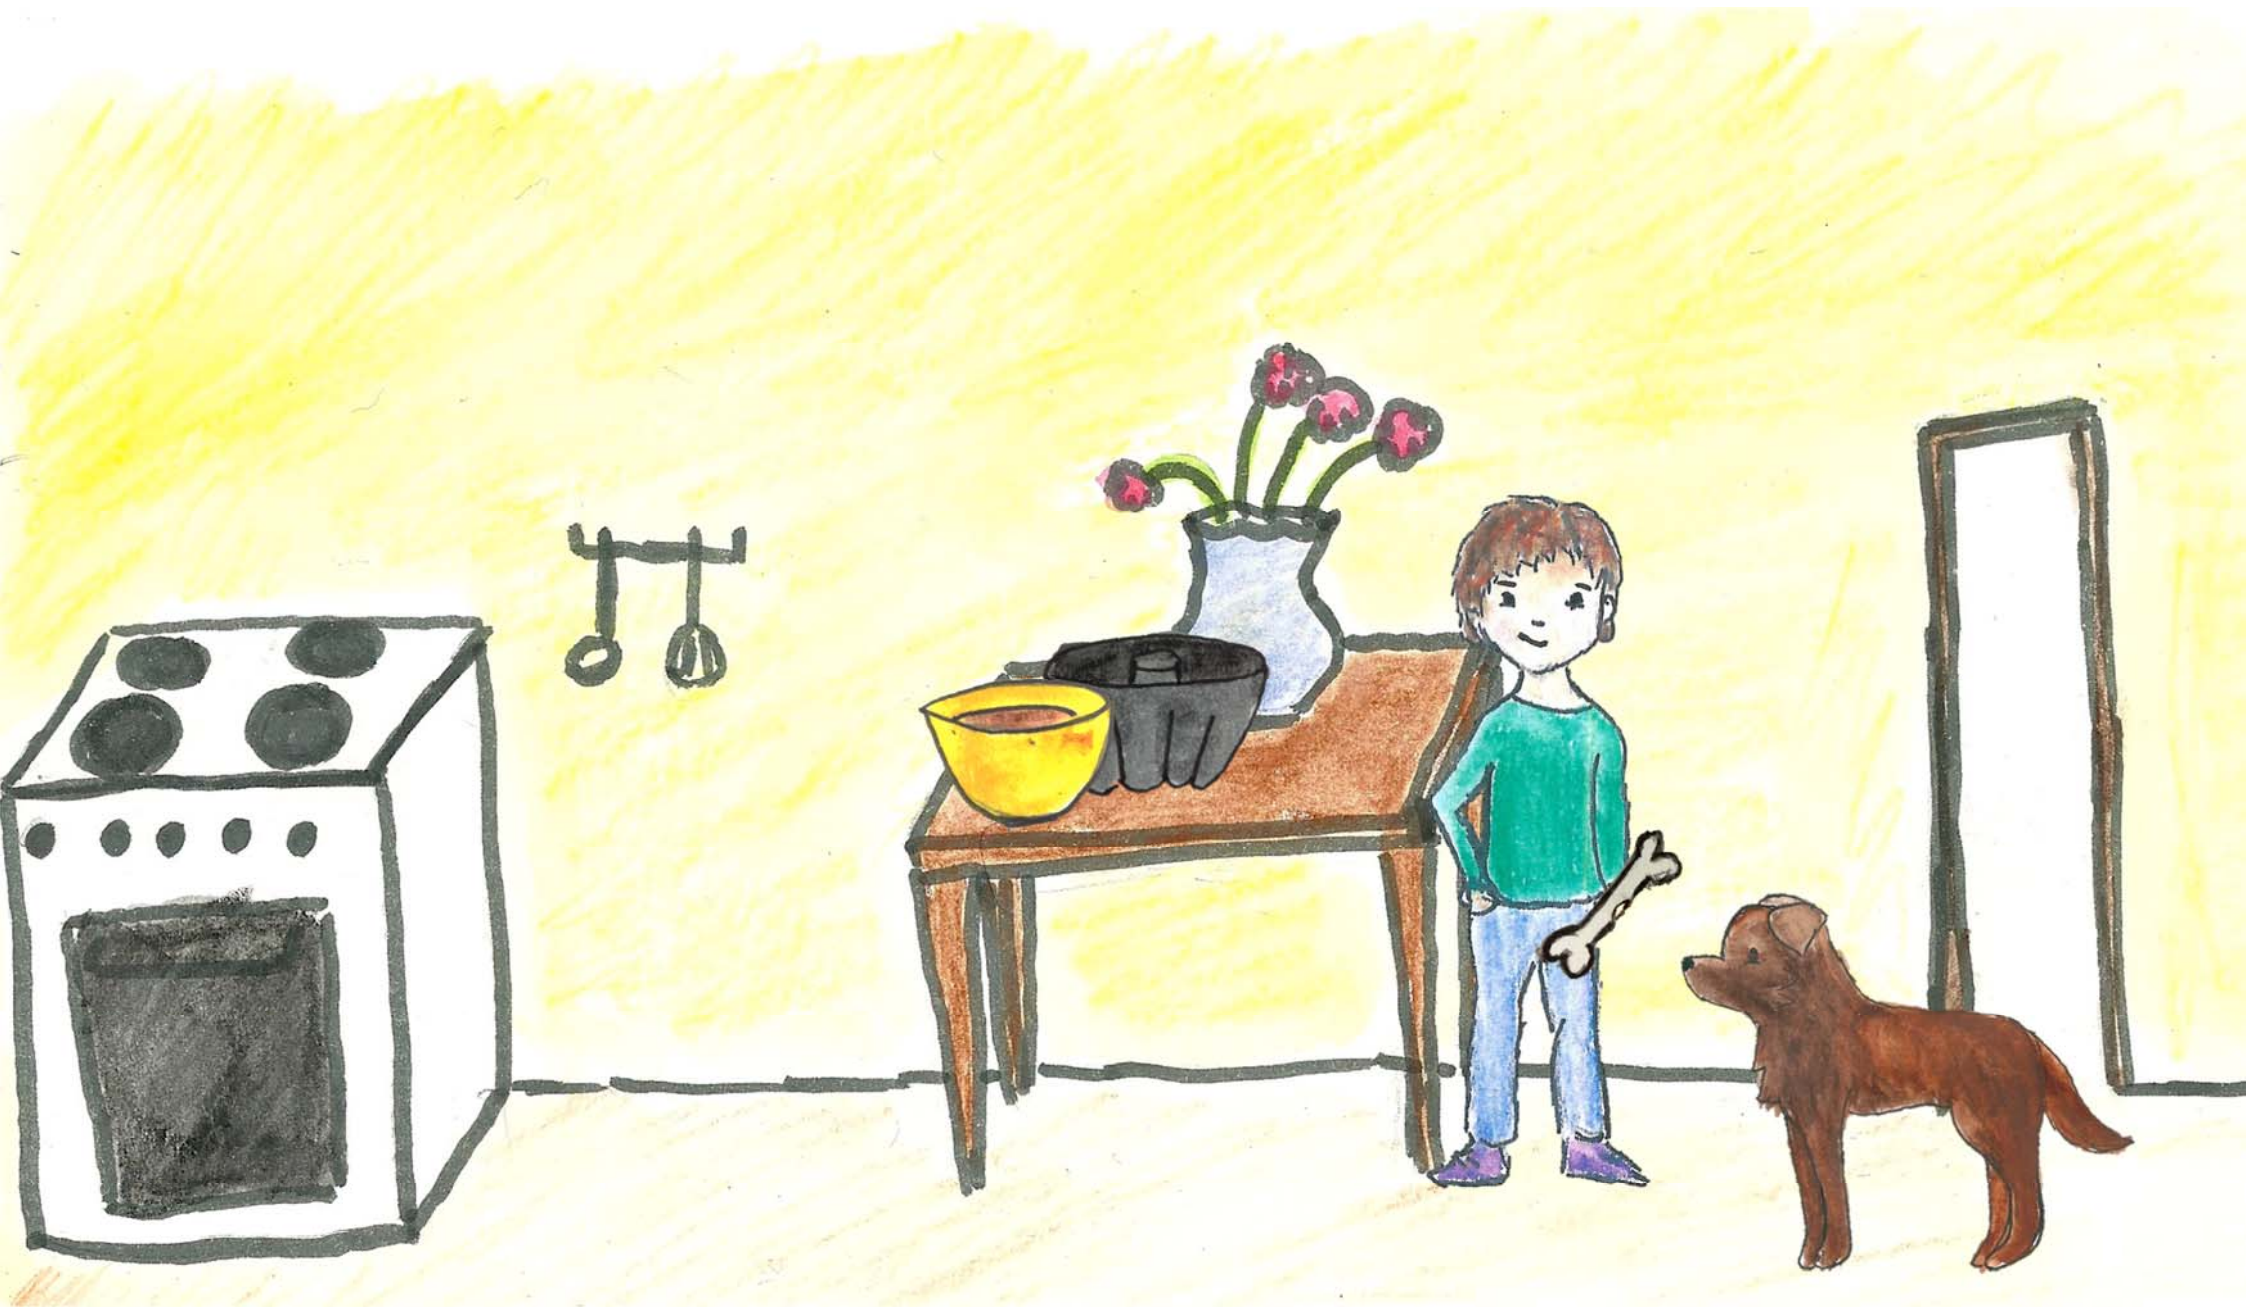



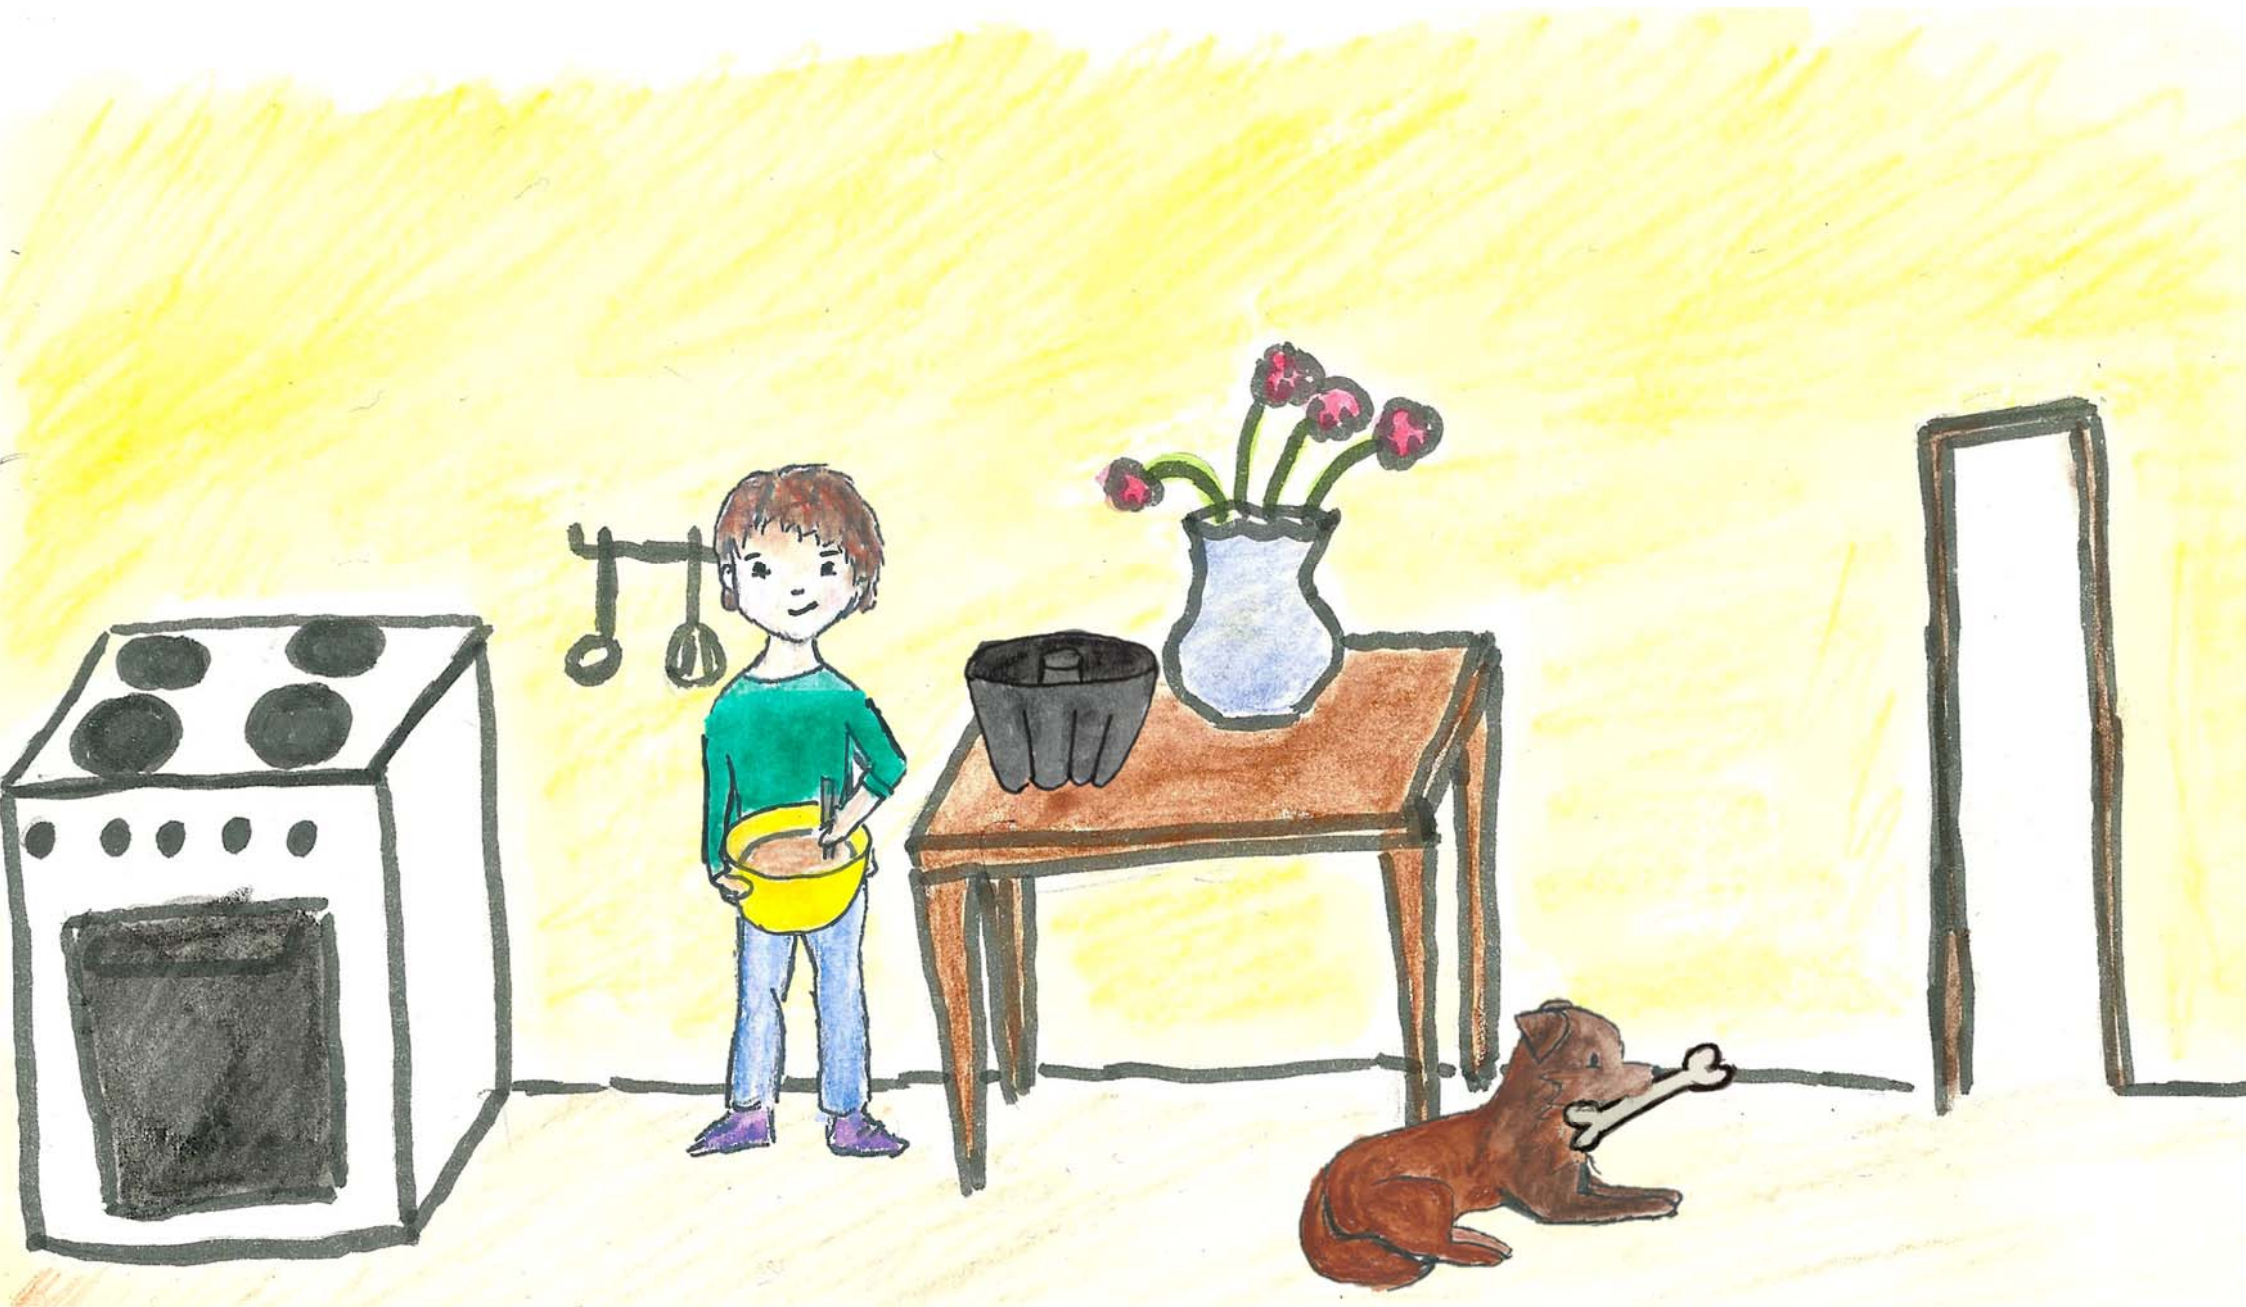

**VL:** Und jetzt frisst der Hund ...

**VL:** Und der Junge rührt ...



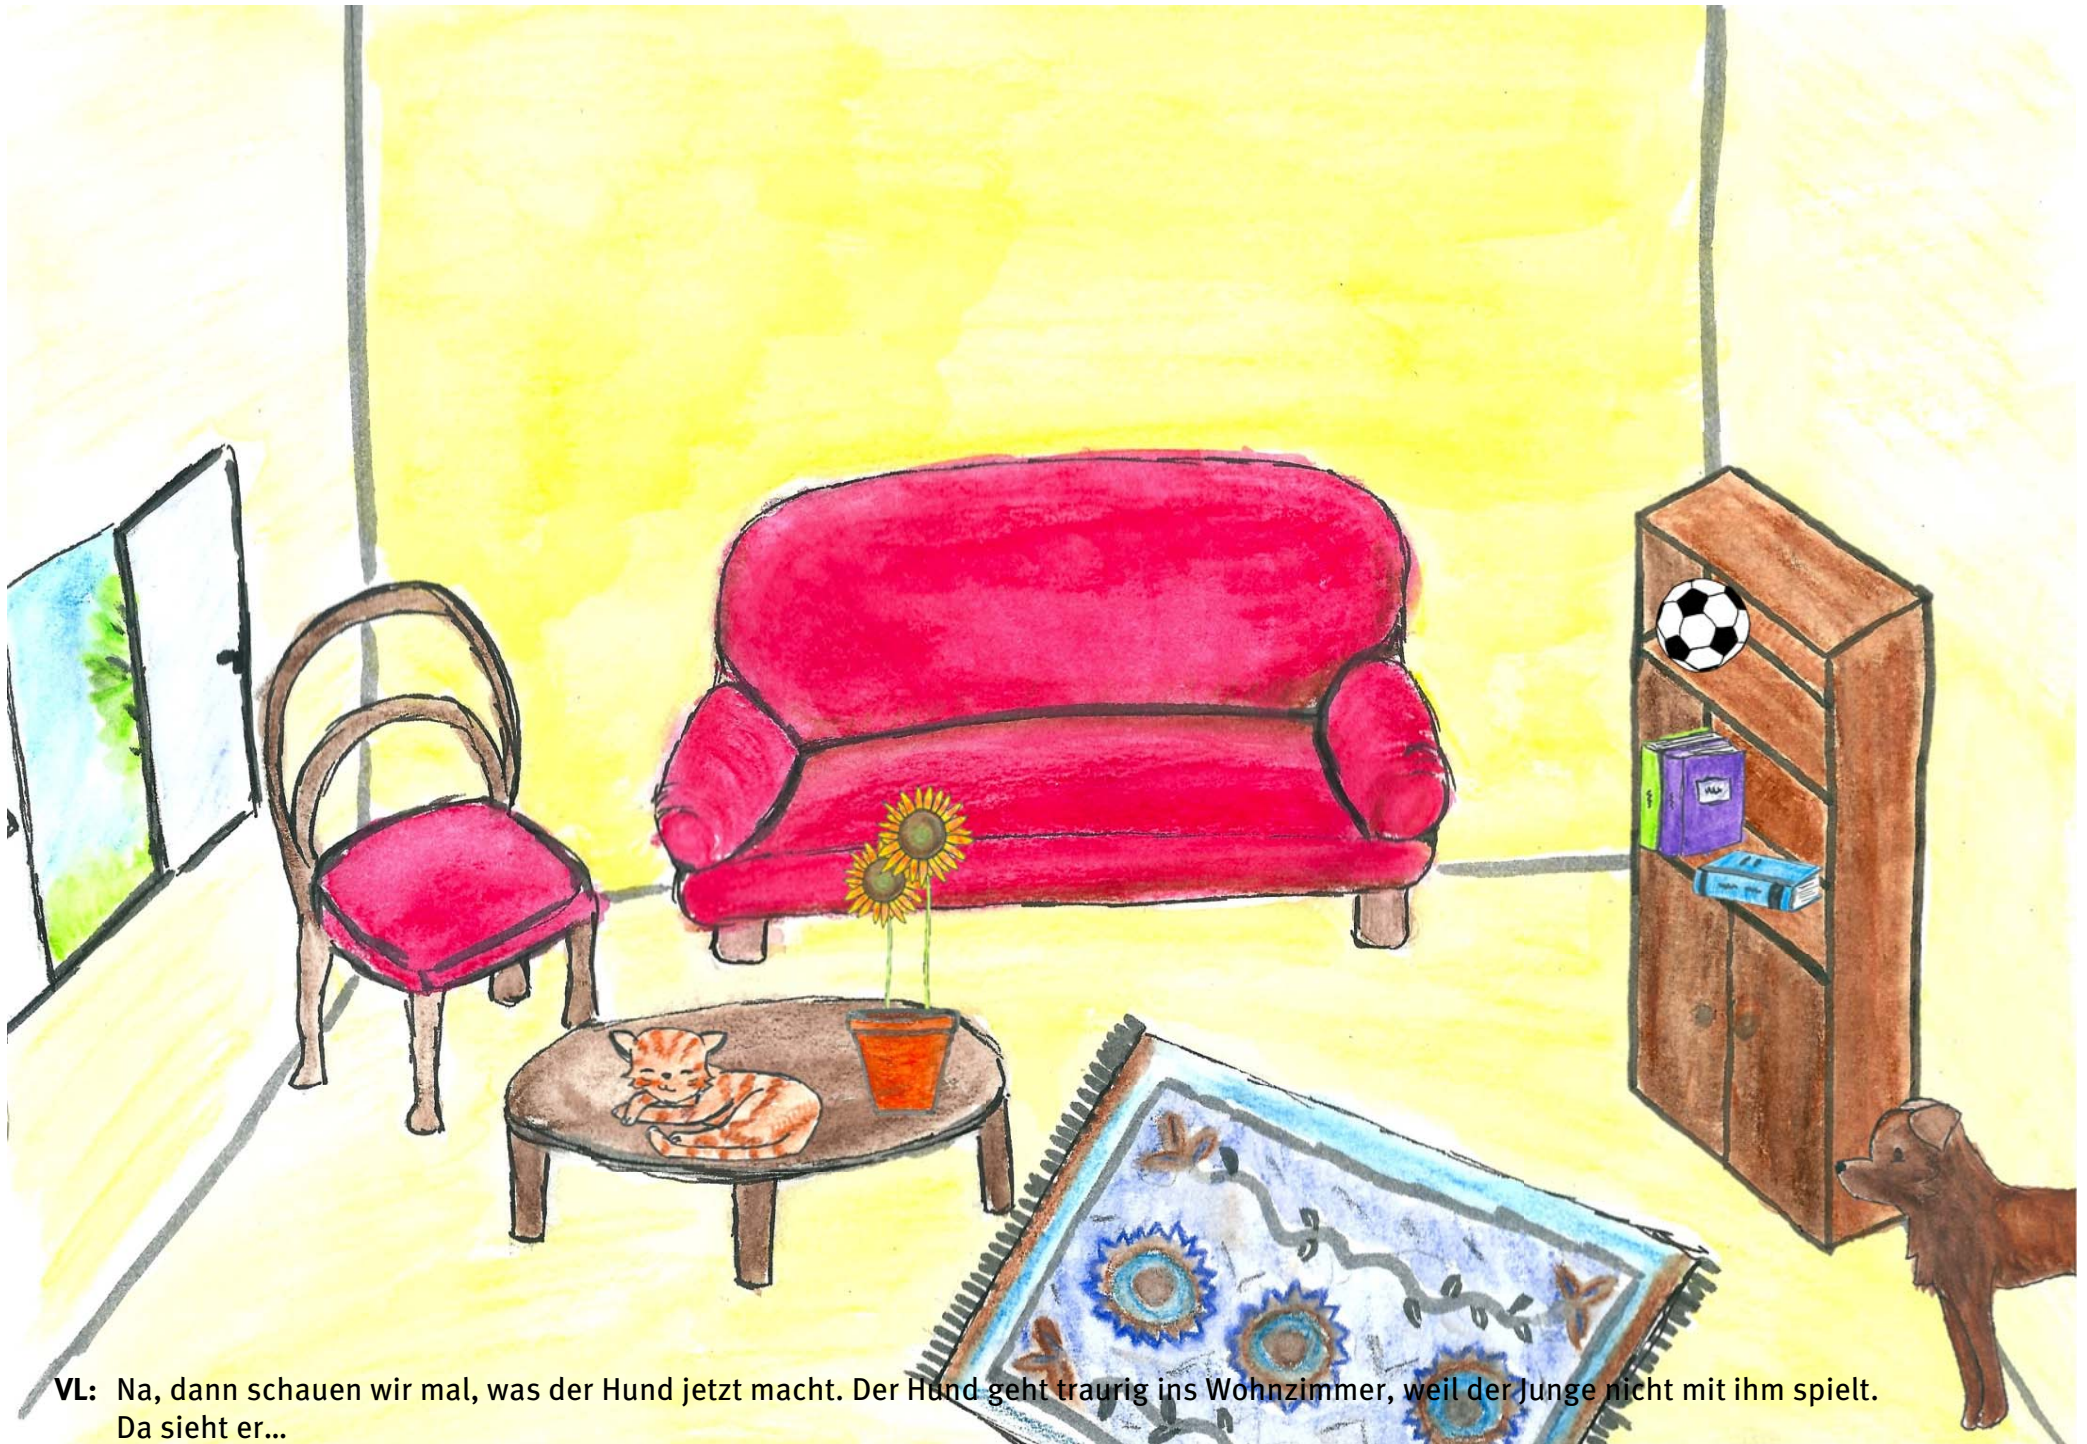

**VL:** Na, dann schauen wir mal, was der Hund jetzt macht. Der Hund geht traurig ins Wohnzimmer, weil der Junge nicht mit ihm spielt. Da sieht er...

Wenn das Kind nur *eine Katze* sagt, dann **P:** Wo ist die Katze?



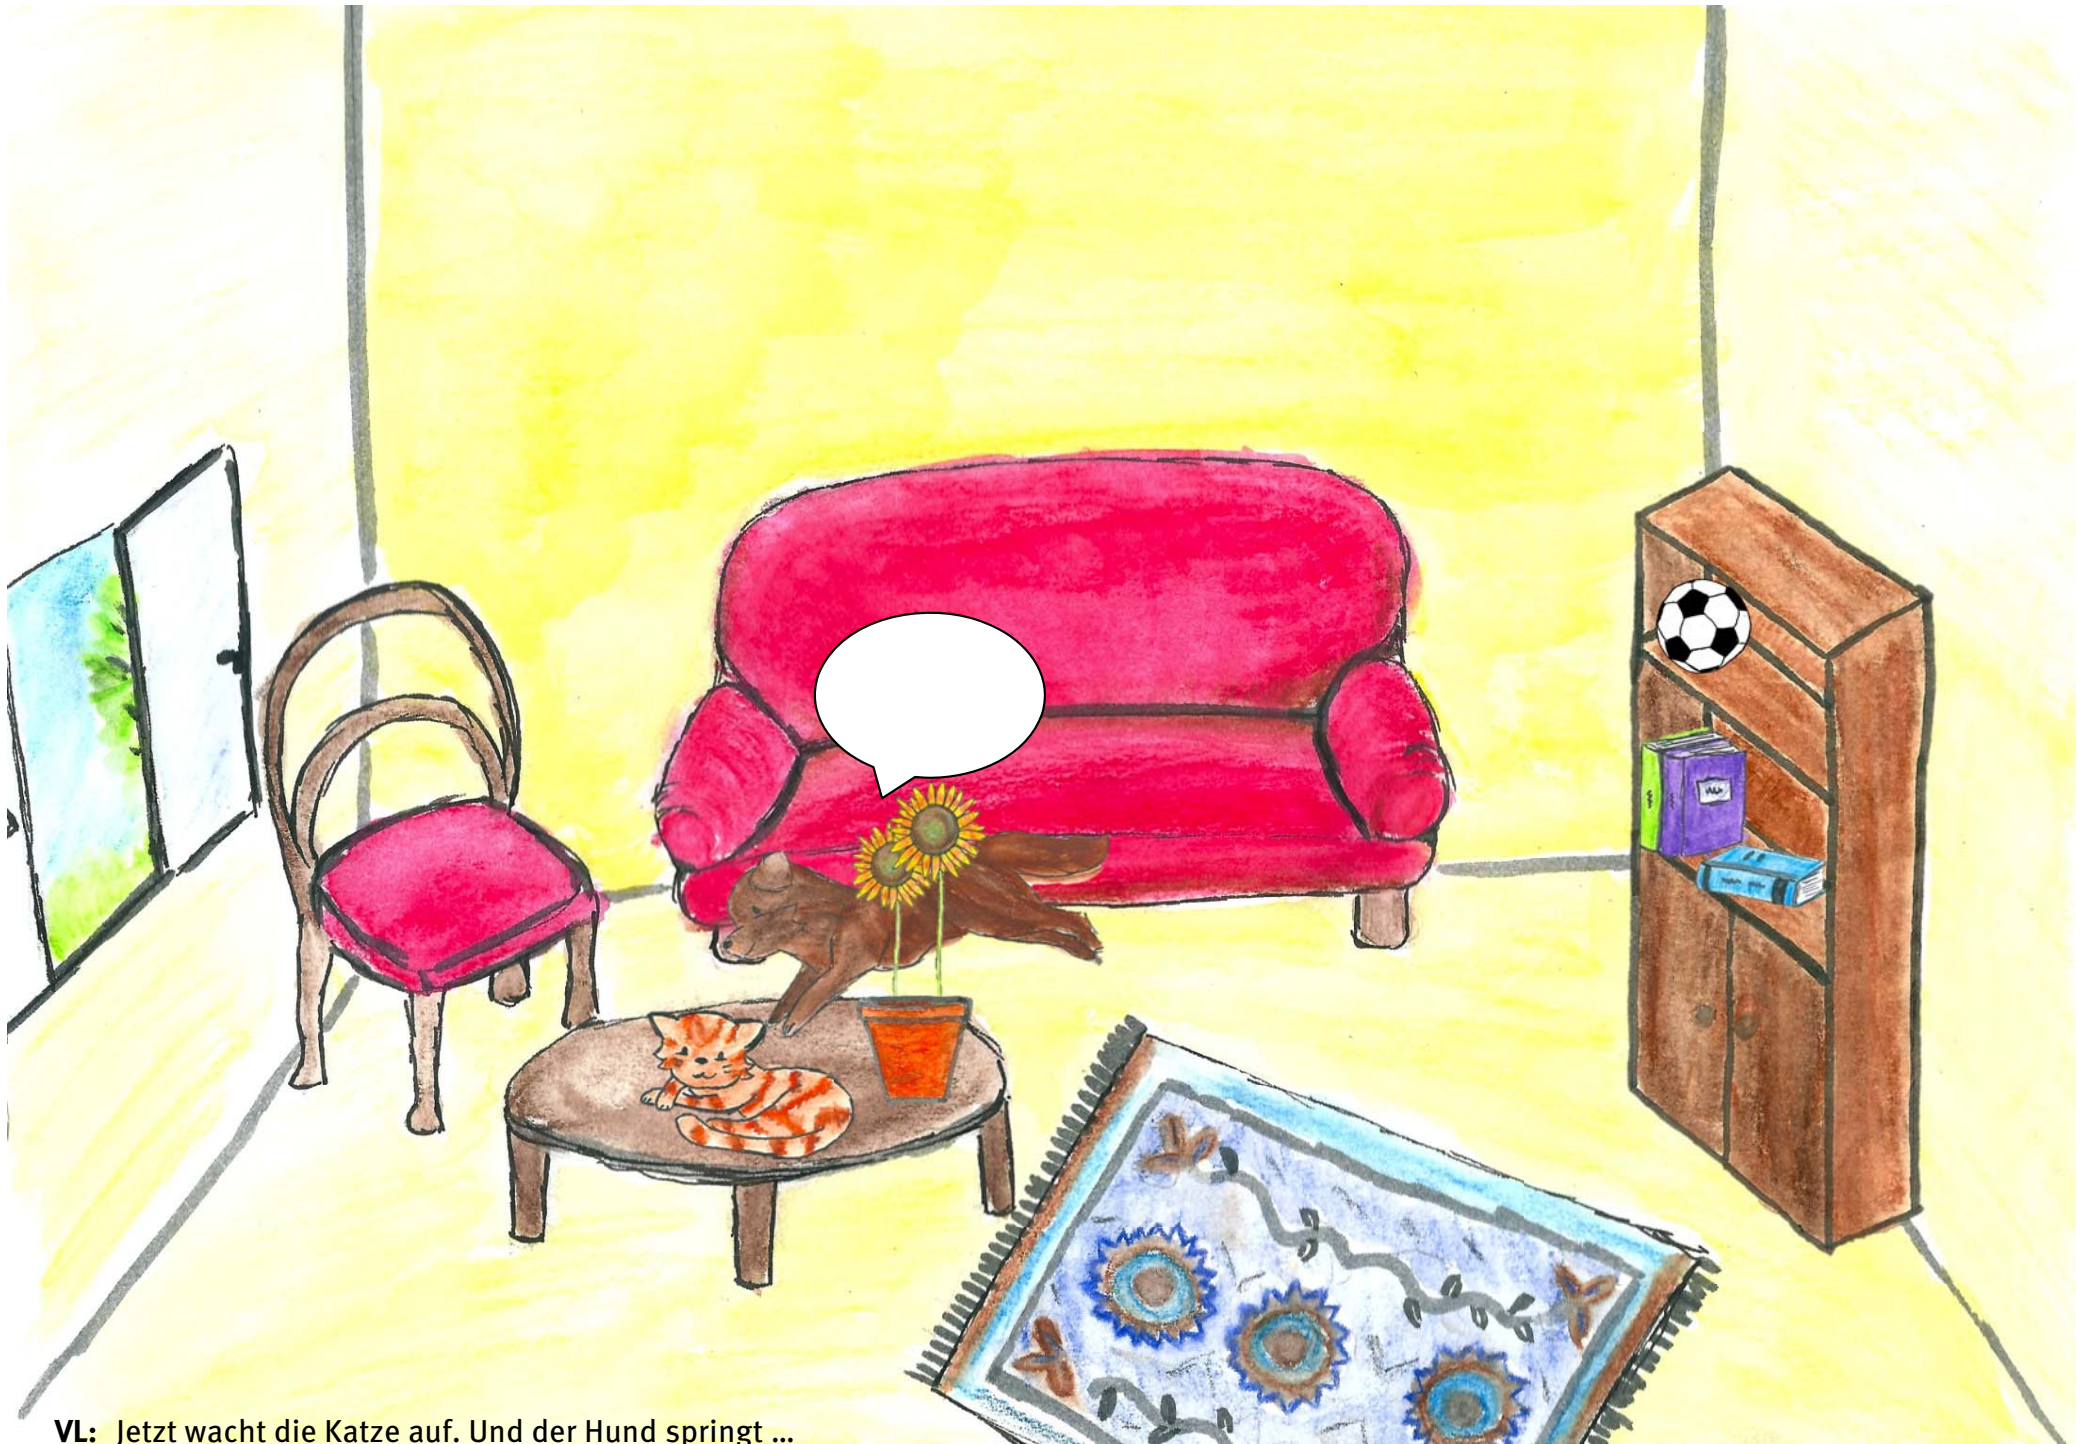

**VL:** Jetzt wacht die Katze auf. Und der Hund springt ...

**VL:** Er fragt die Katze: Spielst du ...?



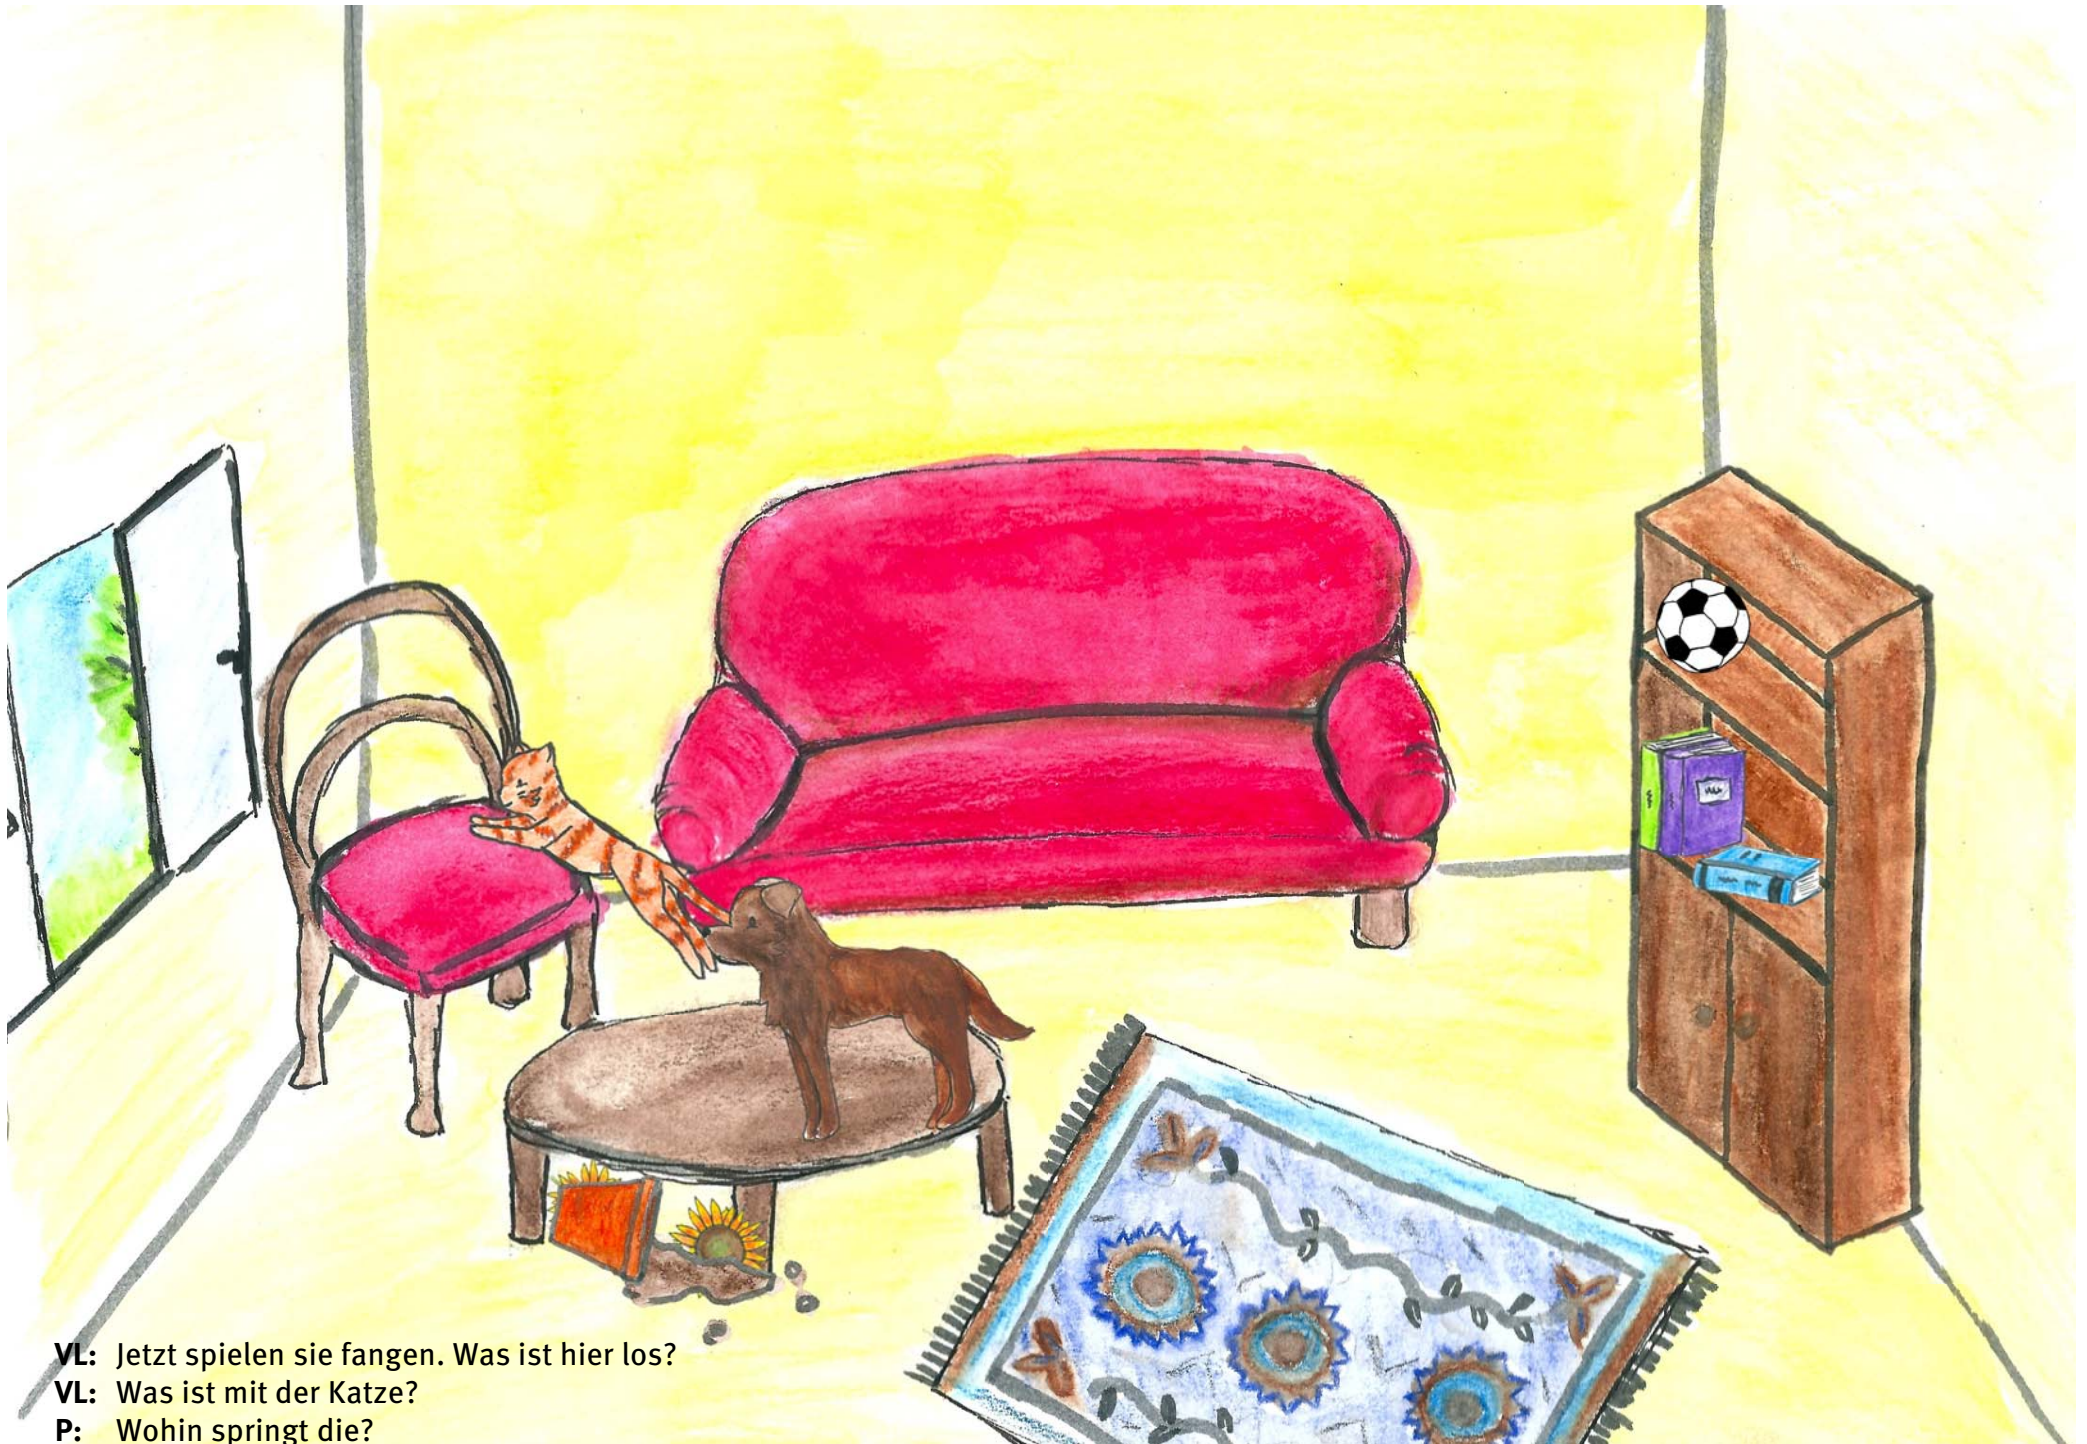

**VL:** Jetzt spielen sie fangen. Was ist hier los?

**VL:** Was ist mit der Katze?

**P:** Wohin springt die?

**VL:** Oh, was ist denn mit dem Blumentopf?



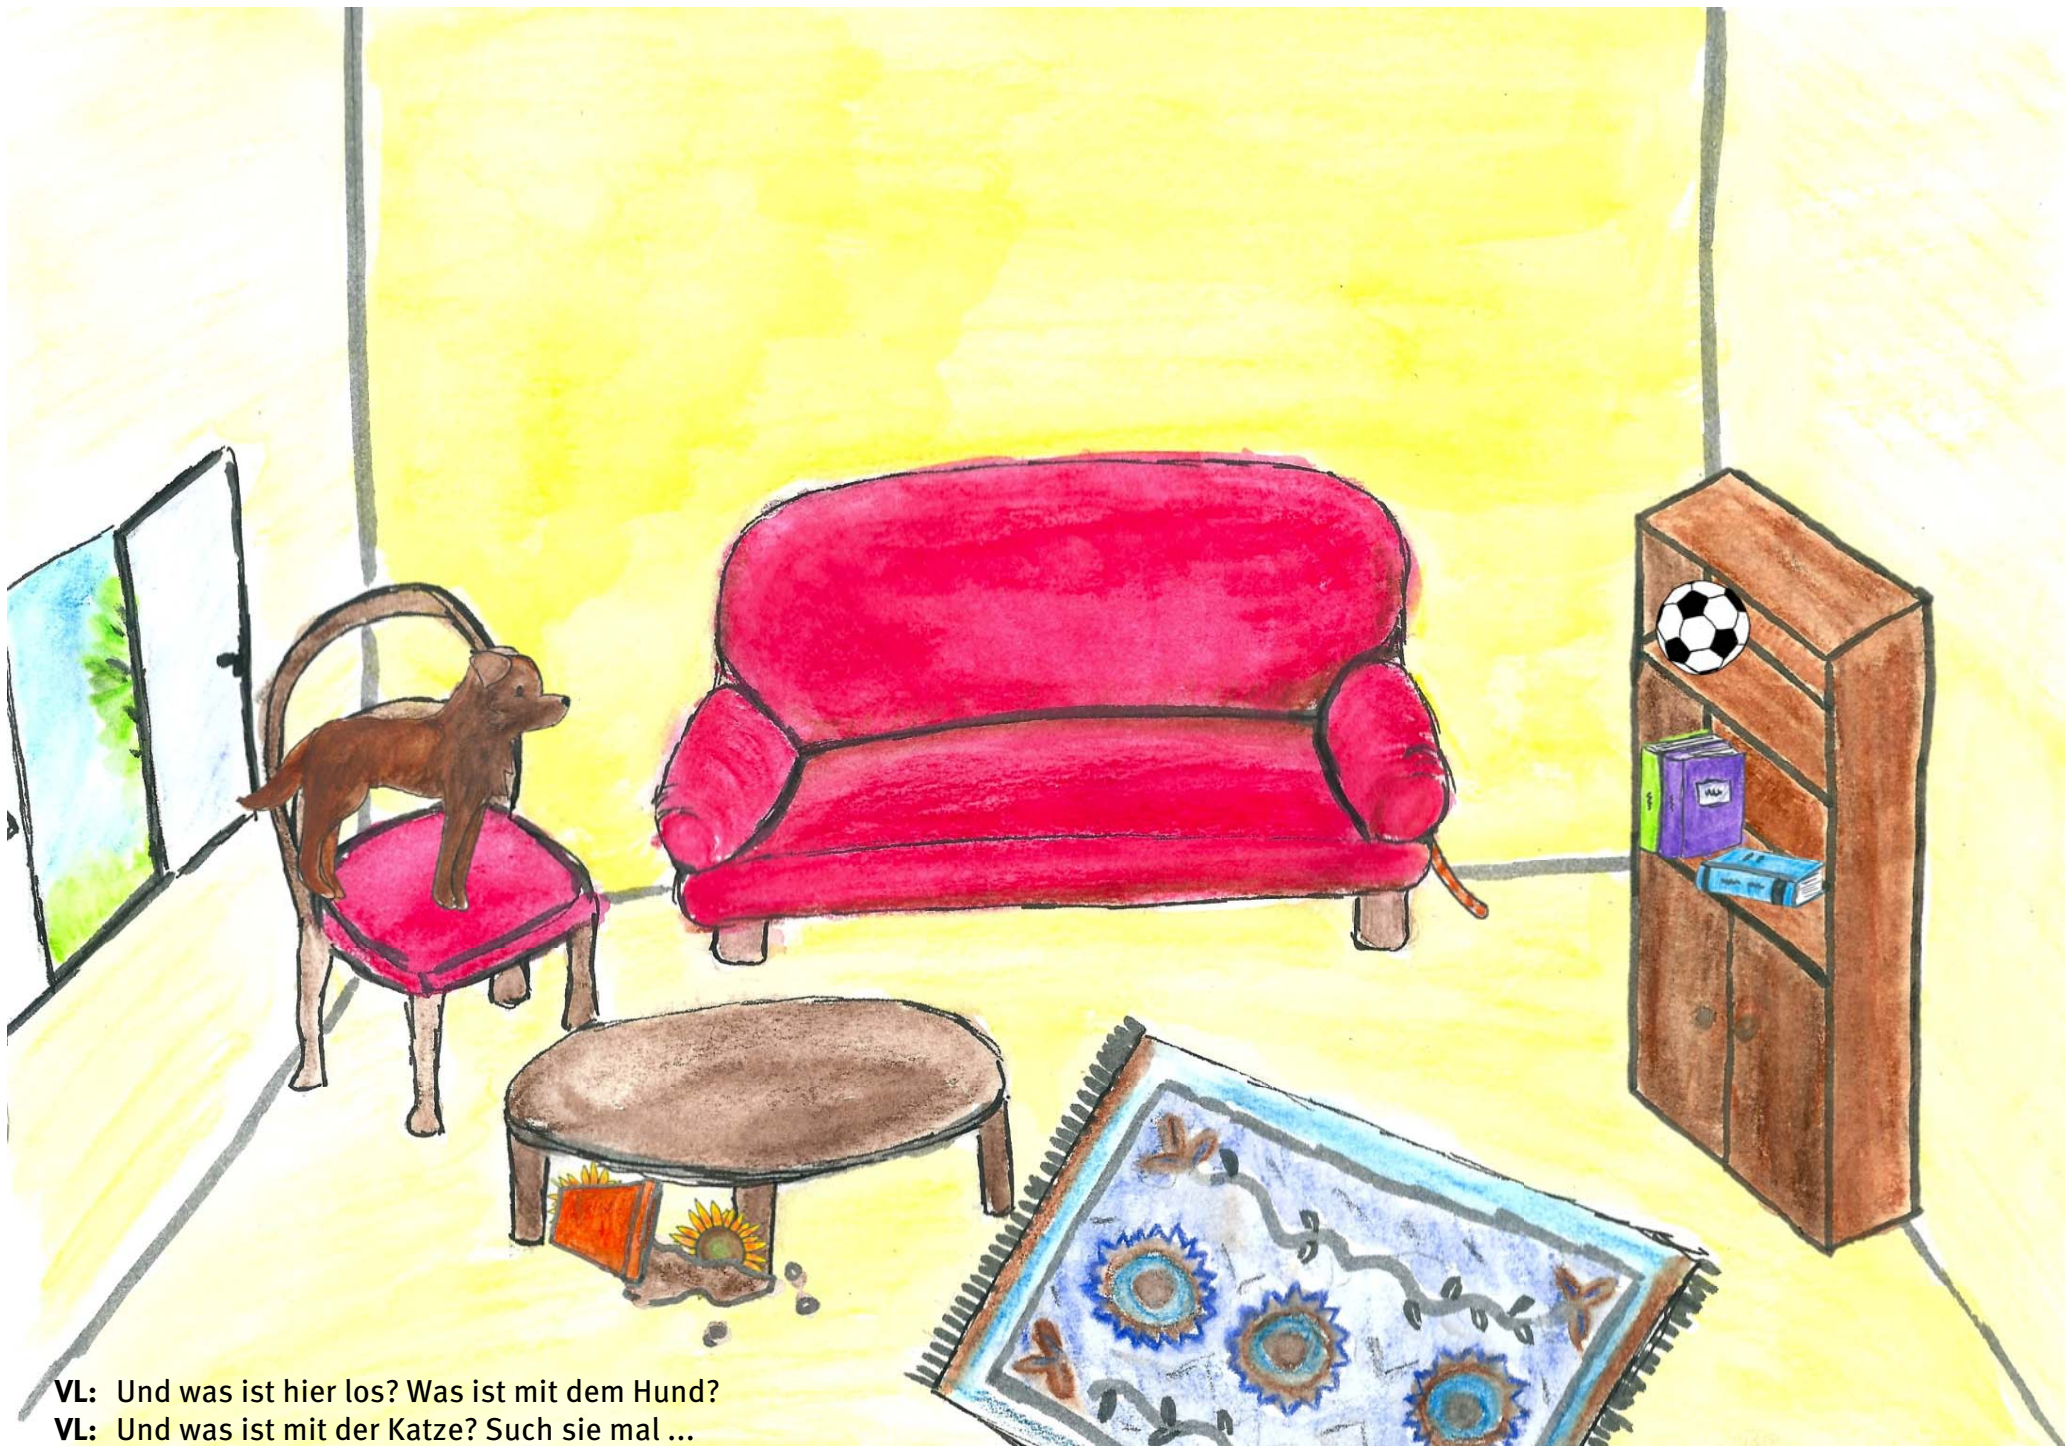

**VL:** Und was ist hier los? Was ist mit dem Hund?

**VL:** Und was ist mit der Katze? Such sie mal ...

**P:** Wo ist die Katze?



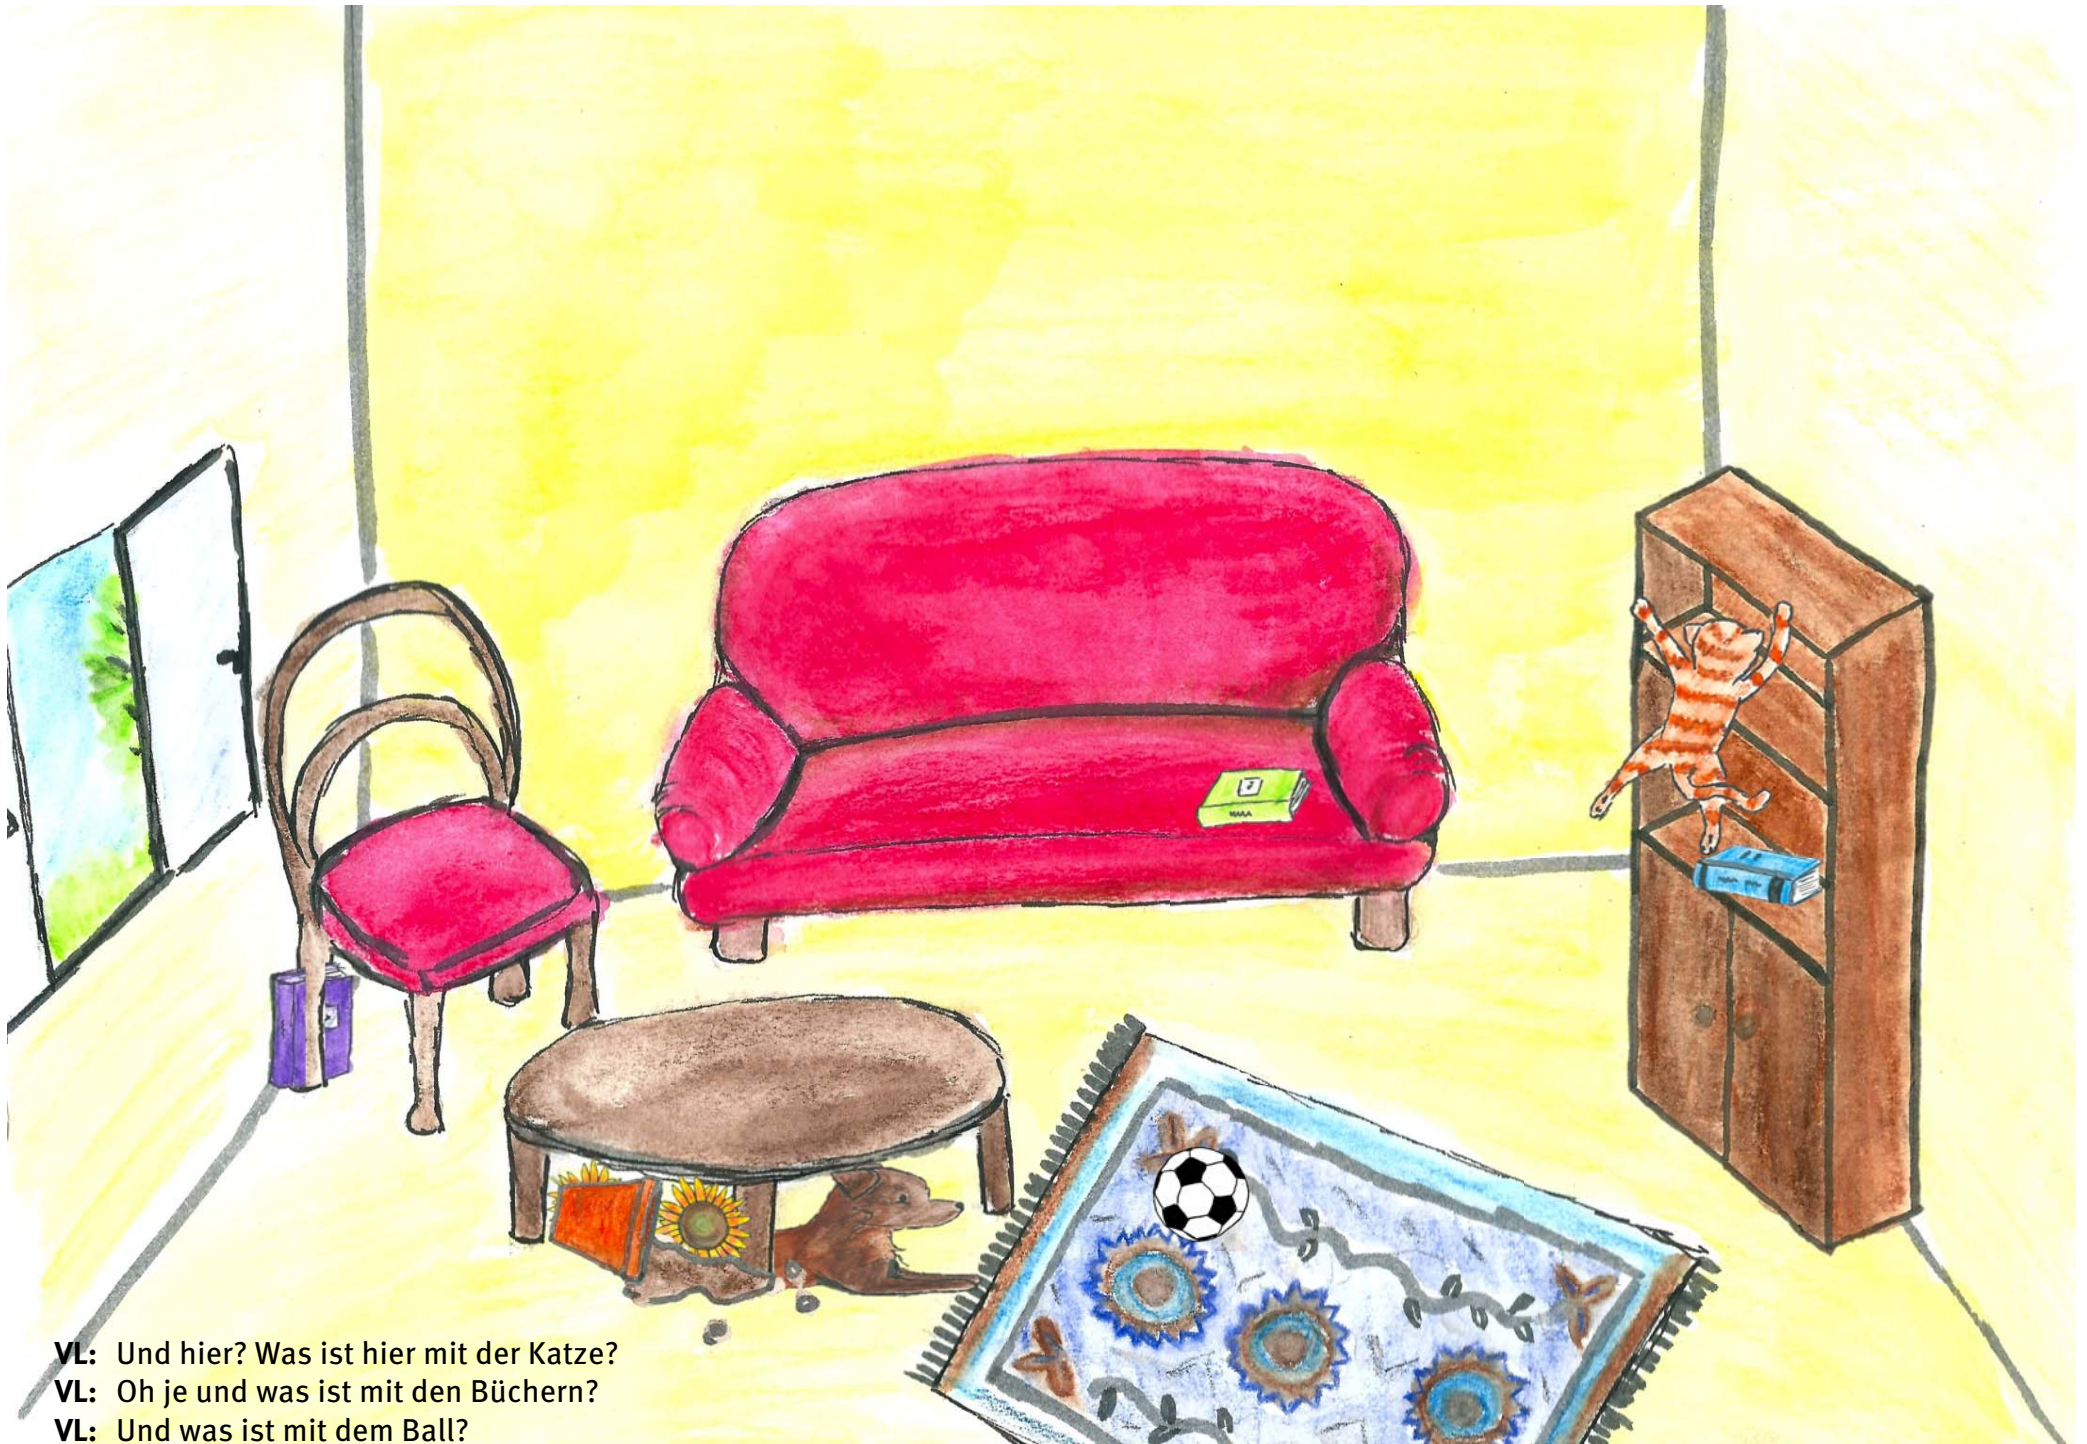

**VL:** Und hier? Was ist hier mit der Katze?

**VL:** Oh je und was ist mit den Büchern?

**VL:** Und was ist mit dem Ball?

**VL:** Und was ist mit dem Hund?



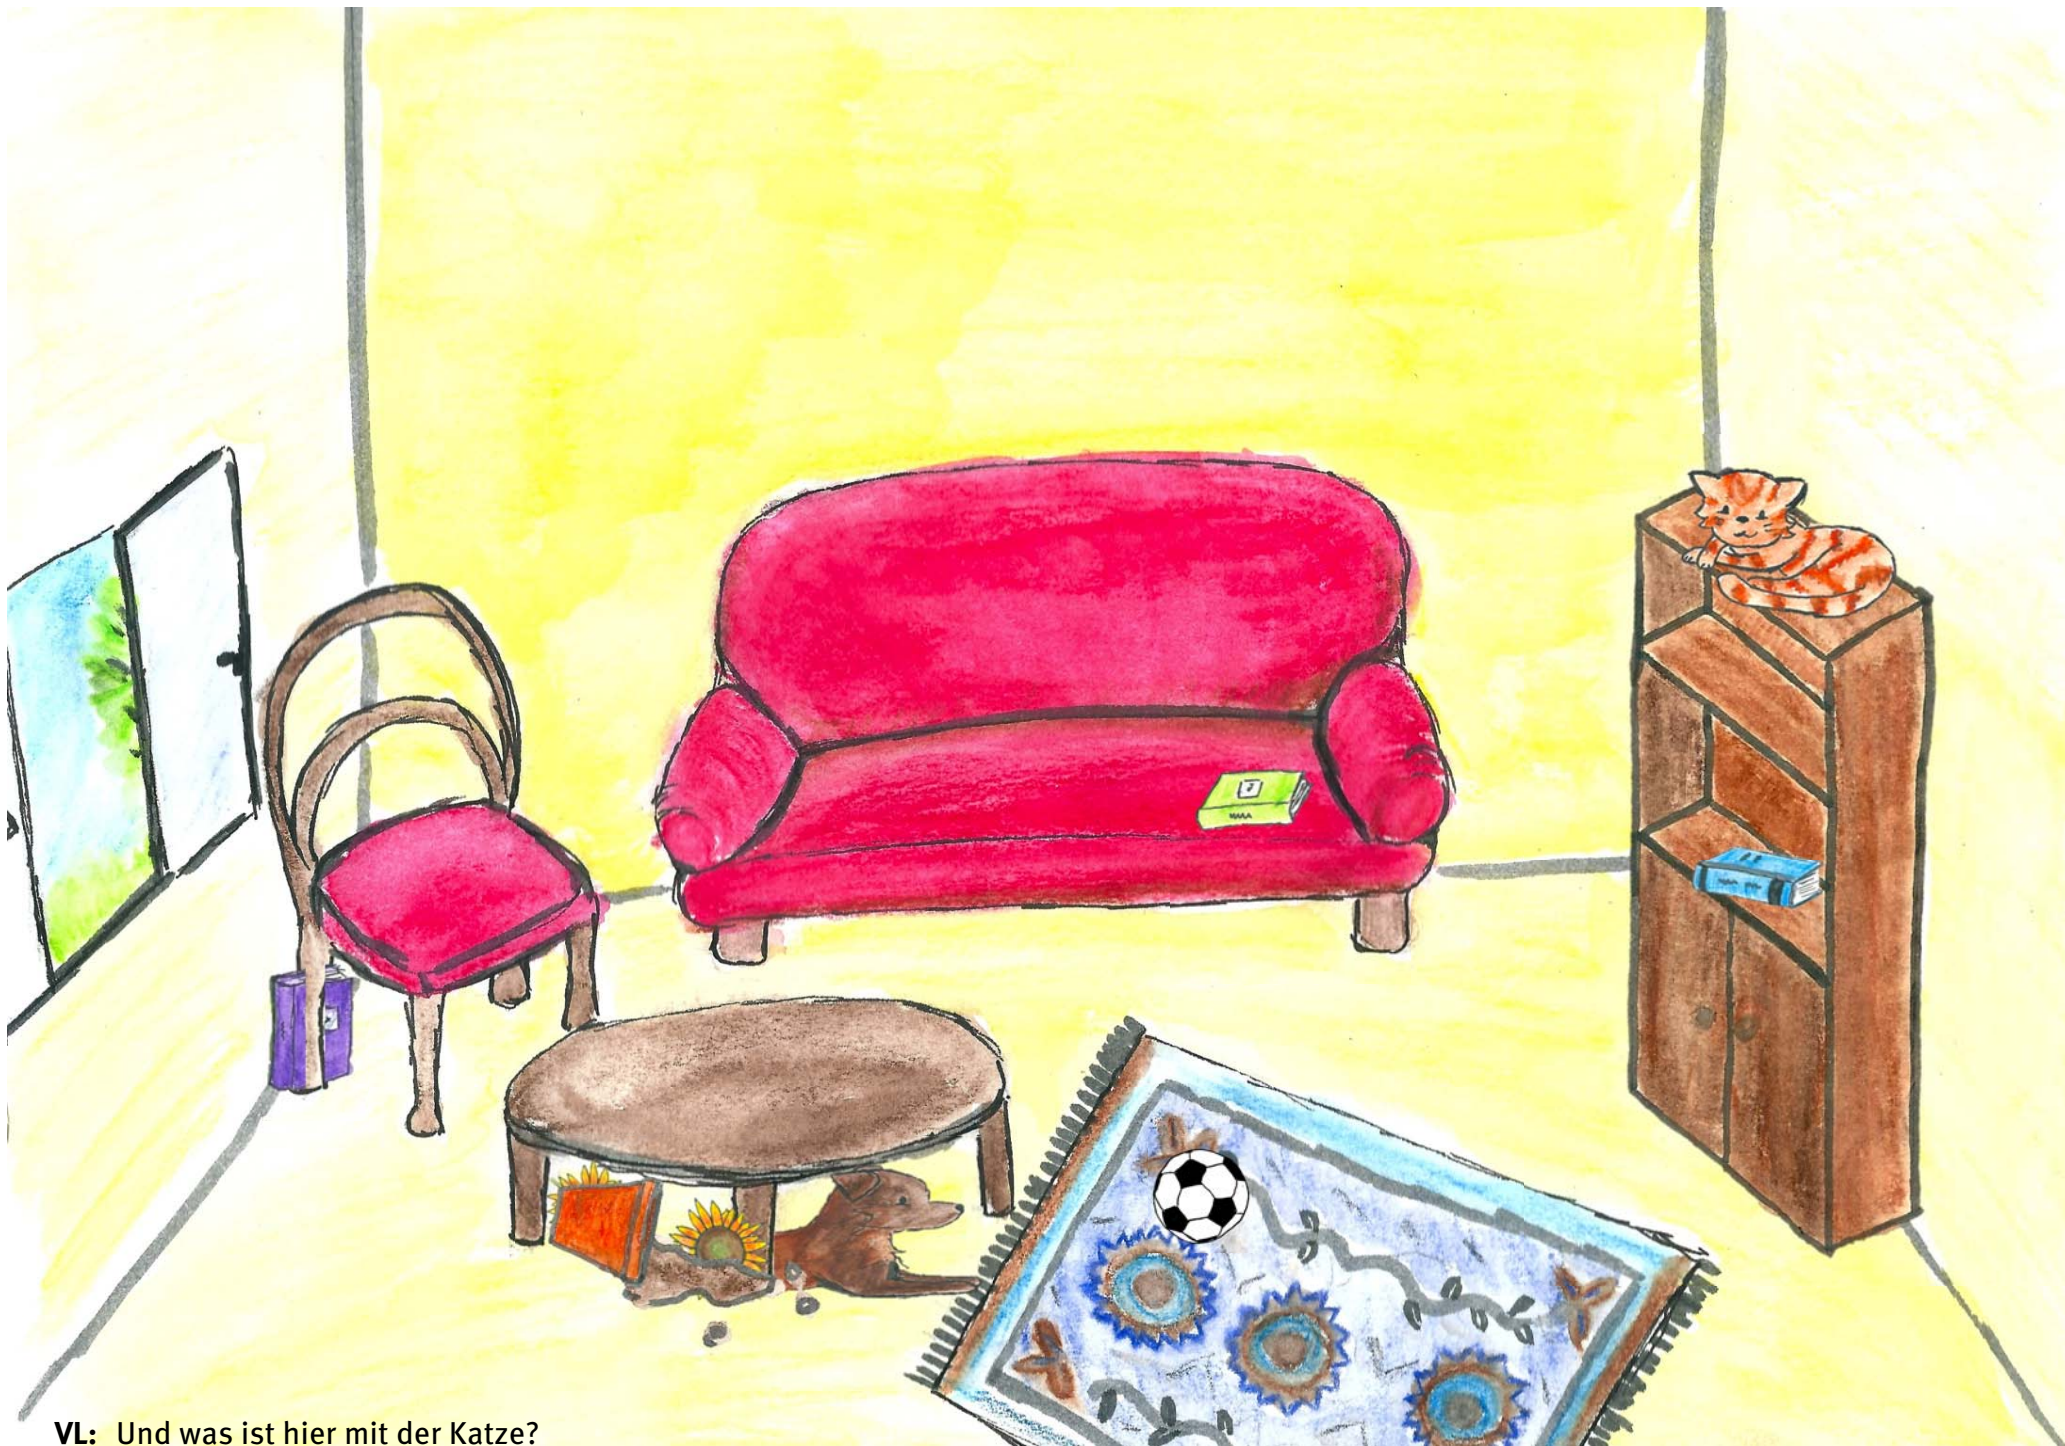

**VL:** Und was ist hier mit der Katze?

**P:** Wo liegt die Katze?



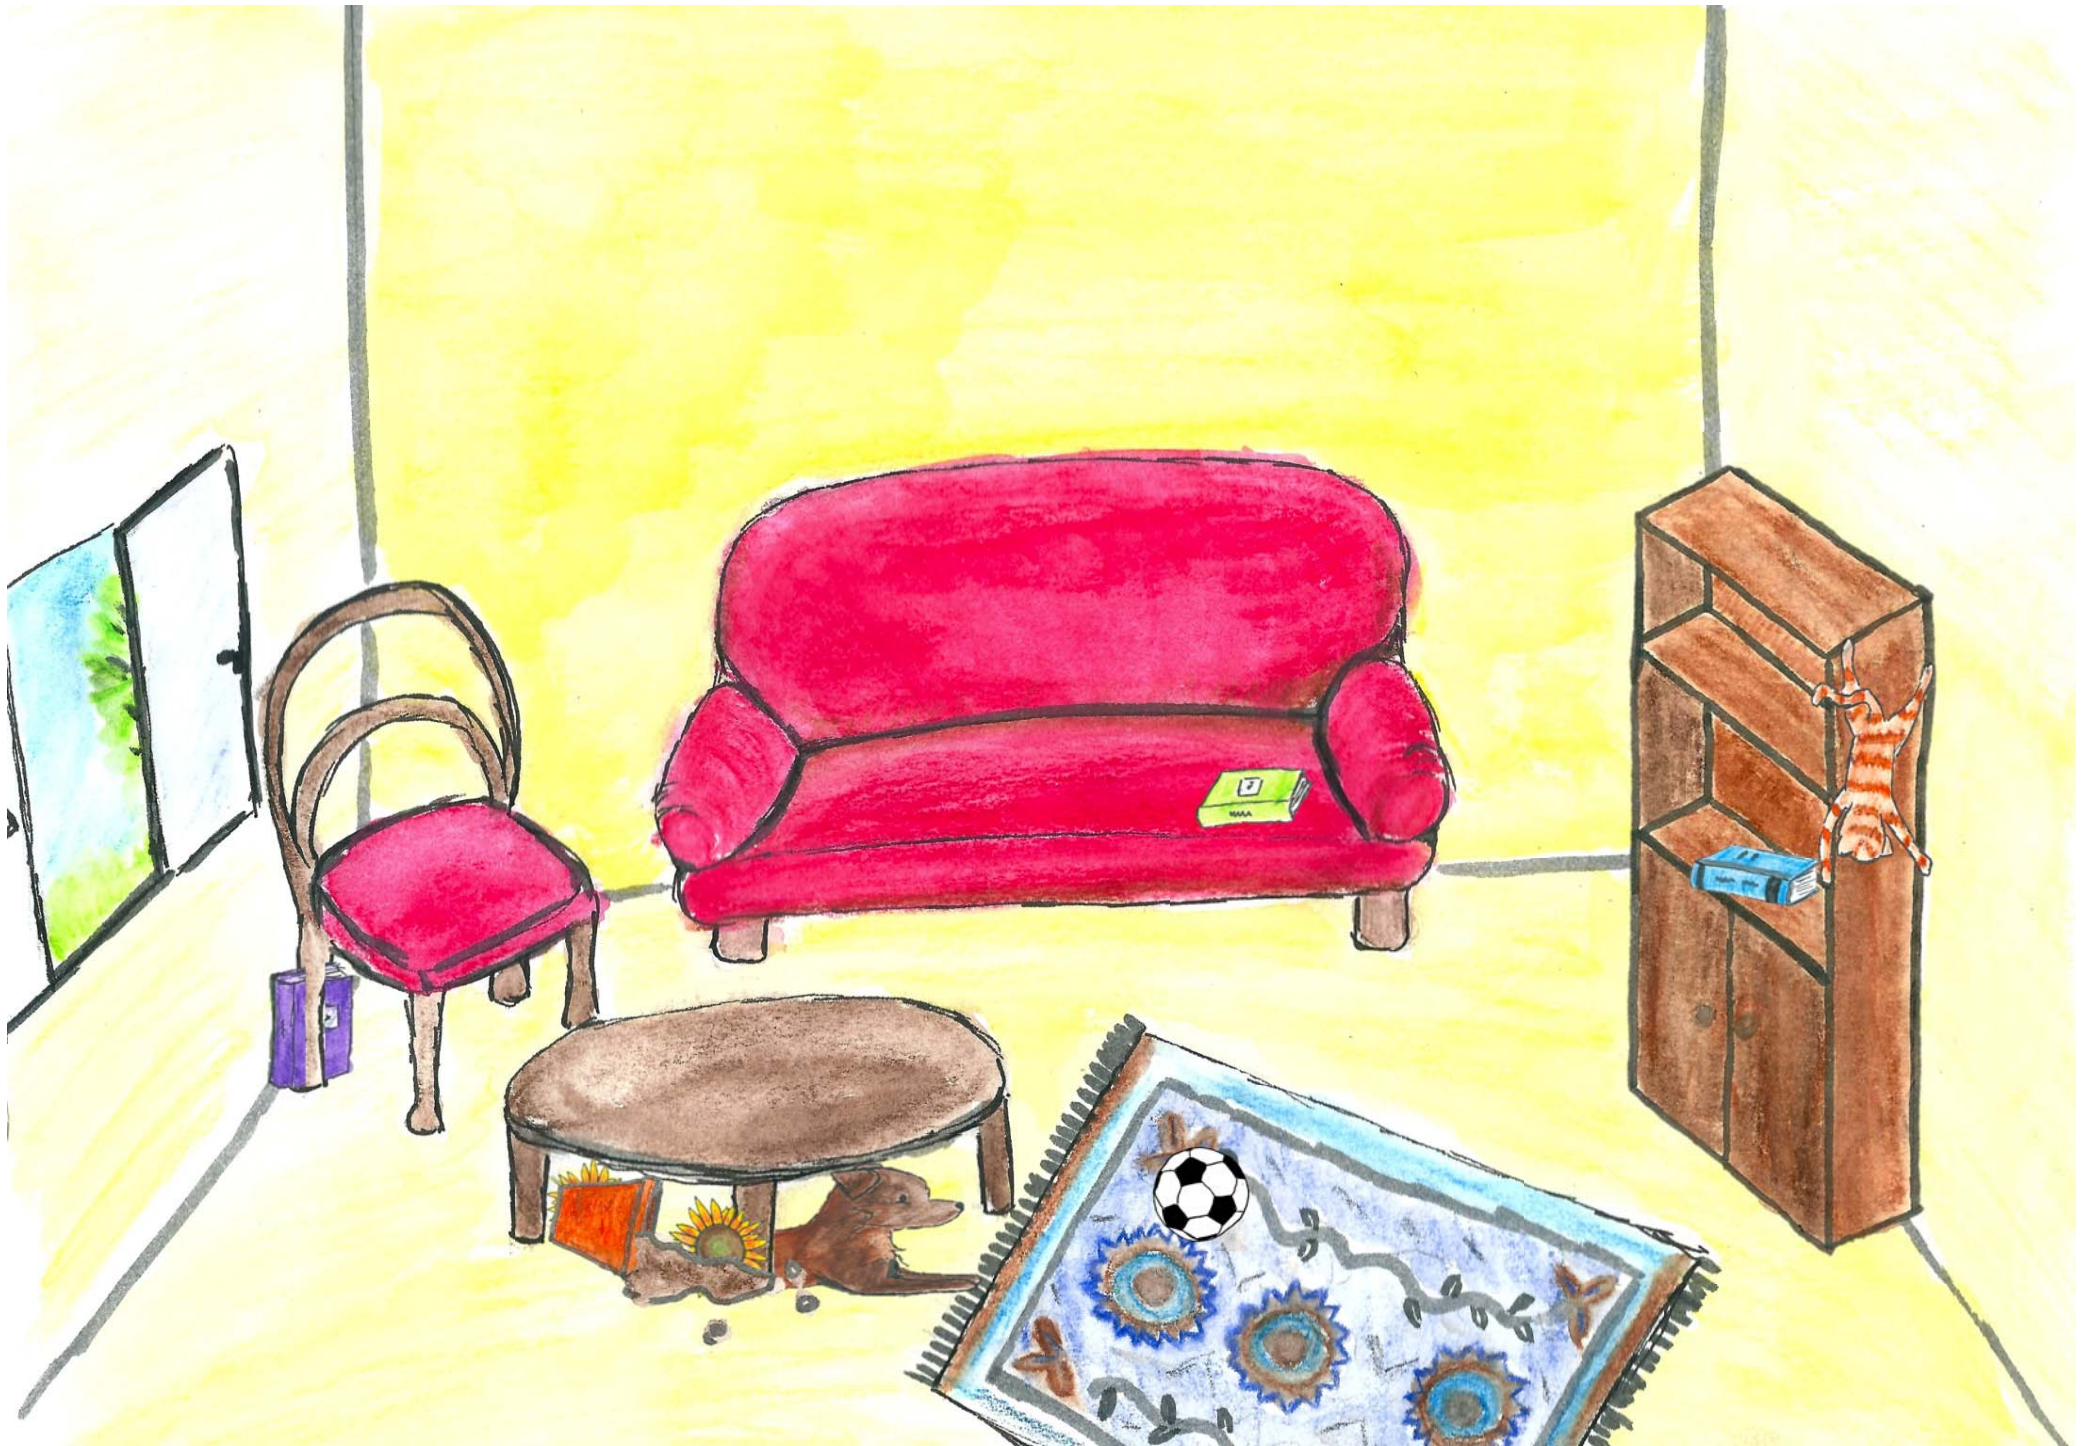

VL: Und was passiert hier?



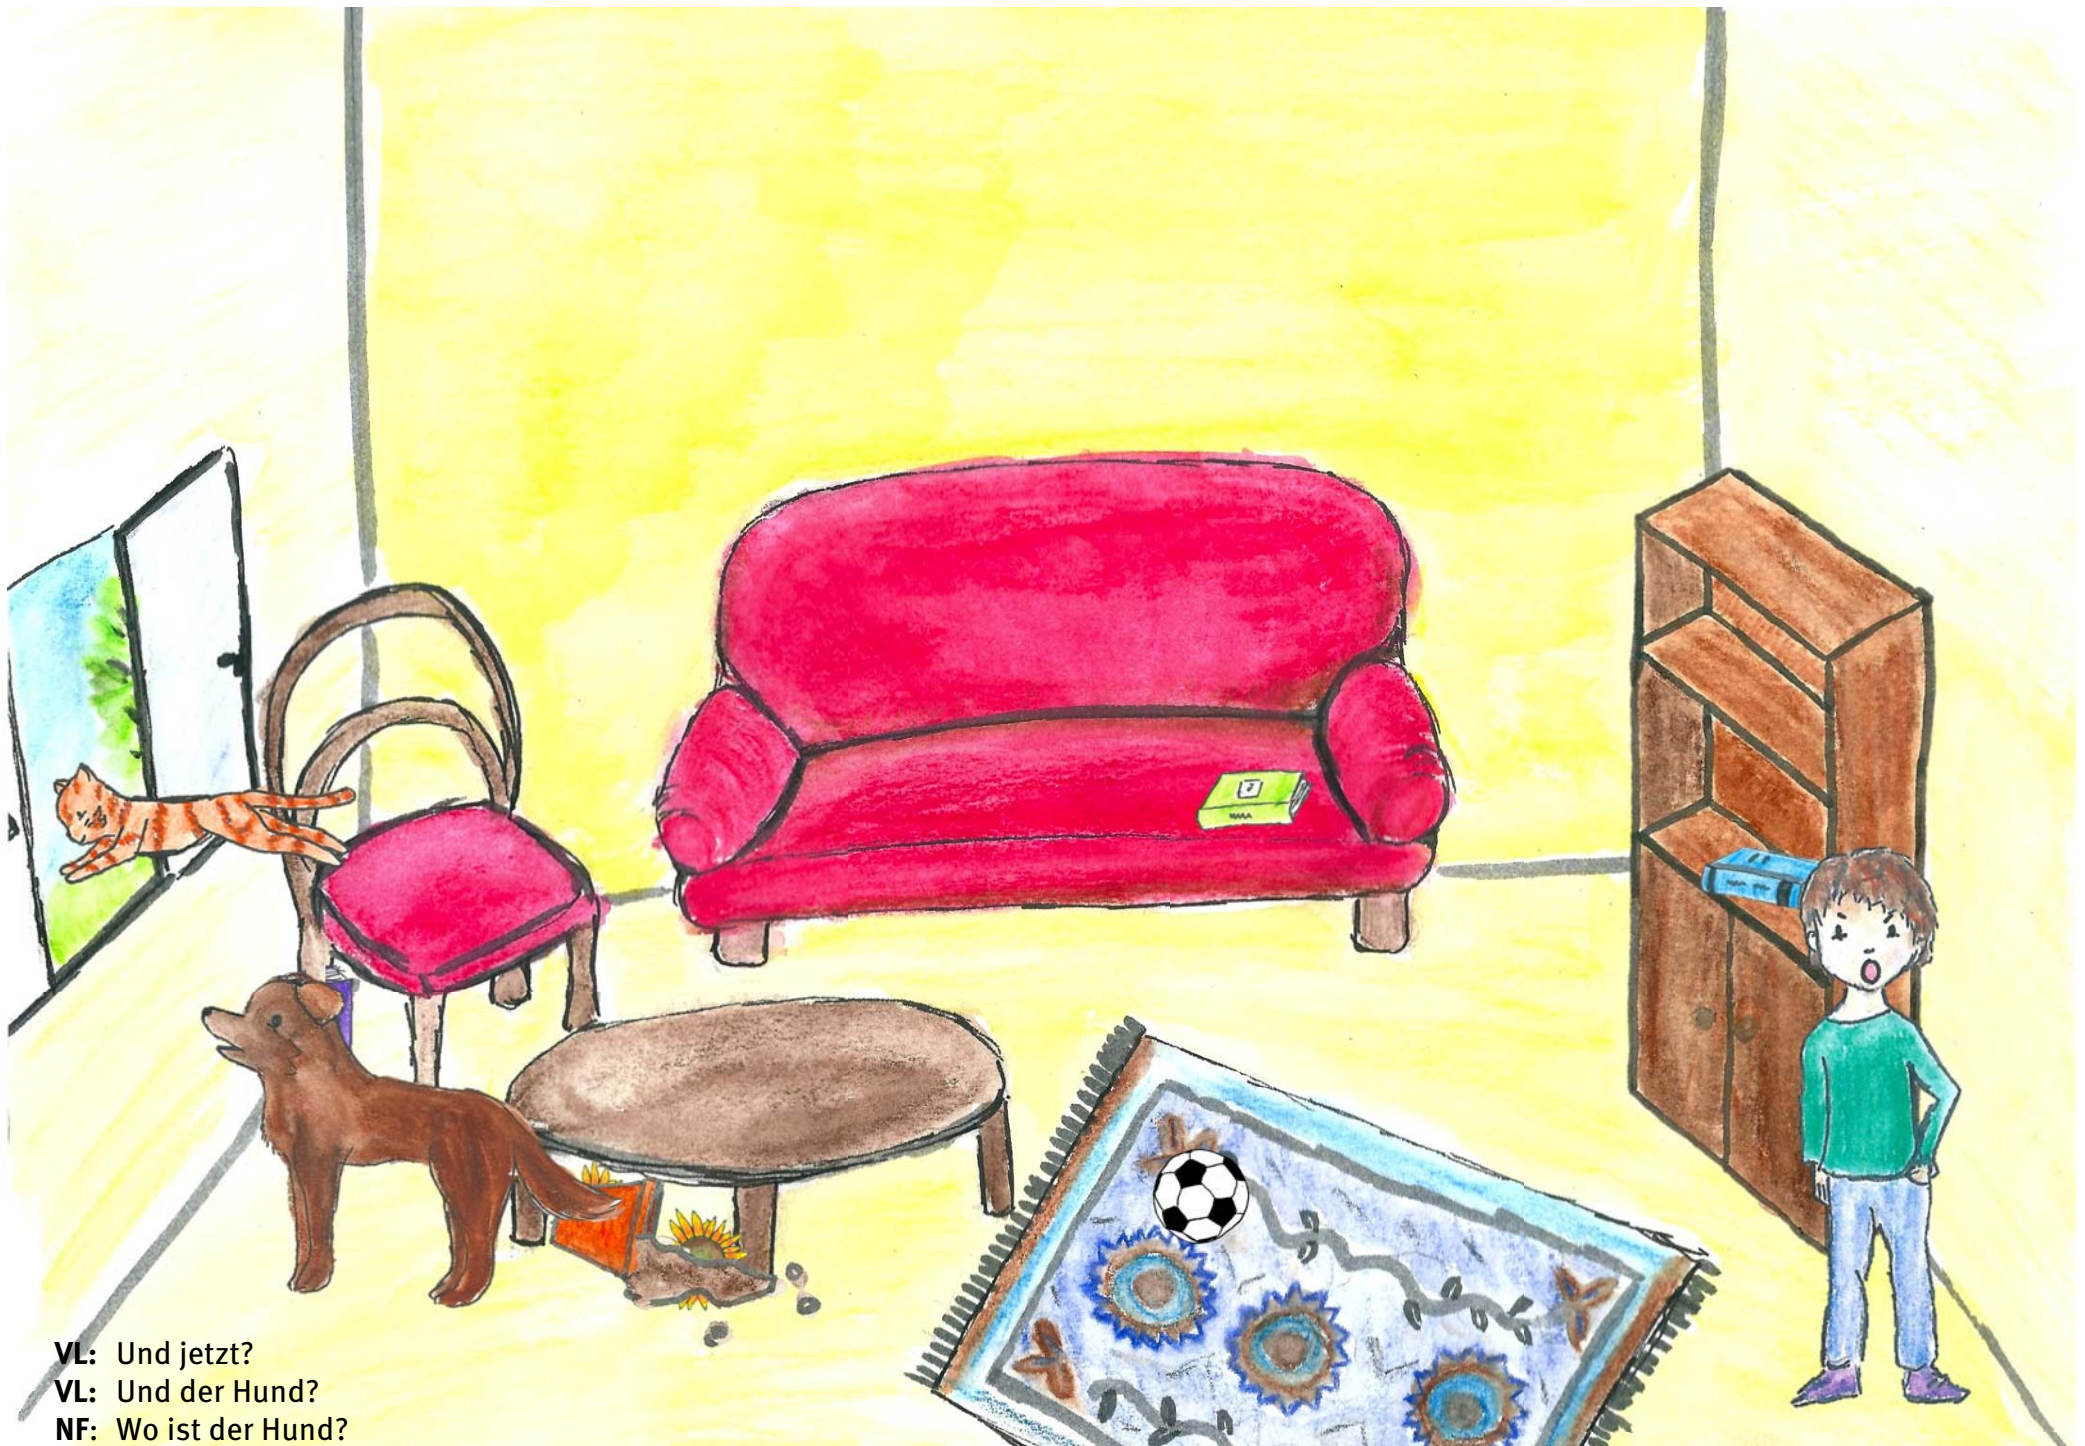

**VL:** Und jetzt?

**VL:** Und der Hund?

**NF:** Wo ist der Hund?

**VL:** Und der Hund bellt so laut, dass der Junge ins Wohnzimmer kommt.



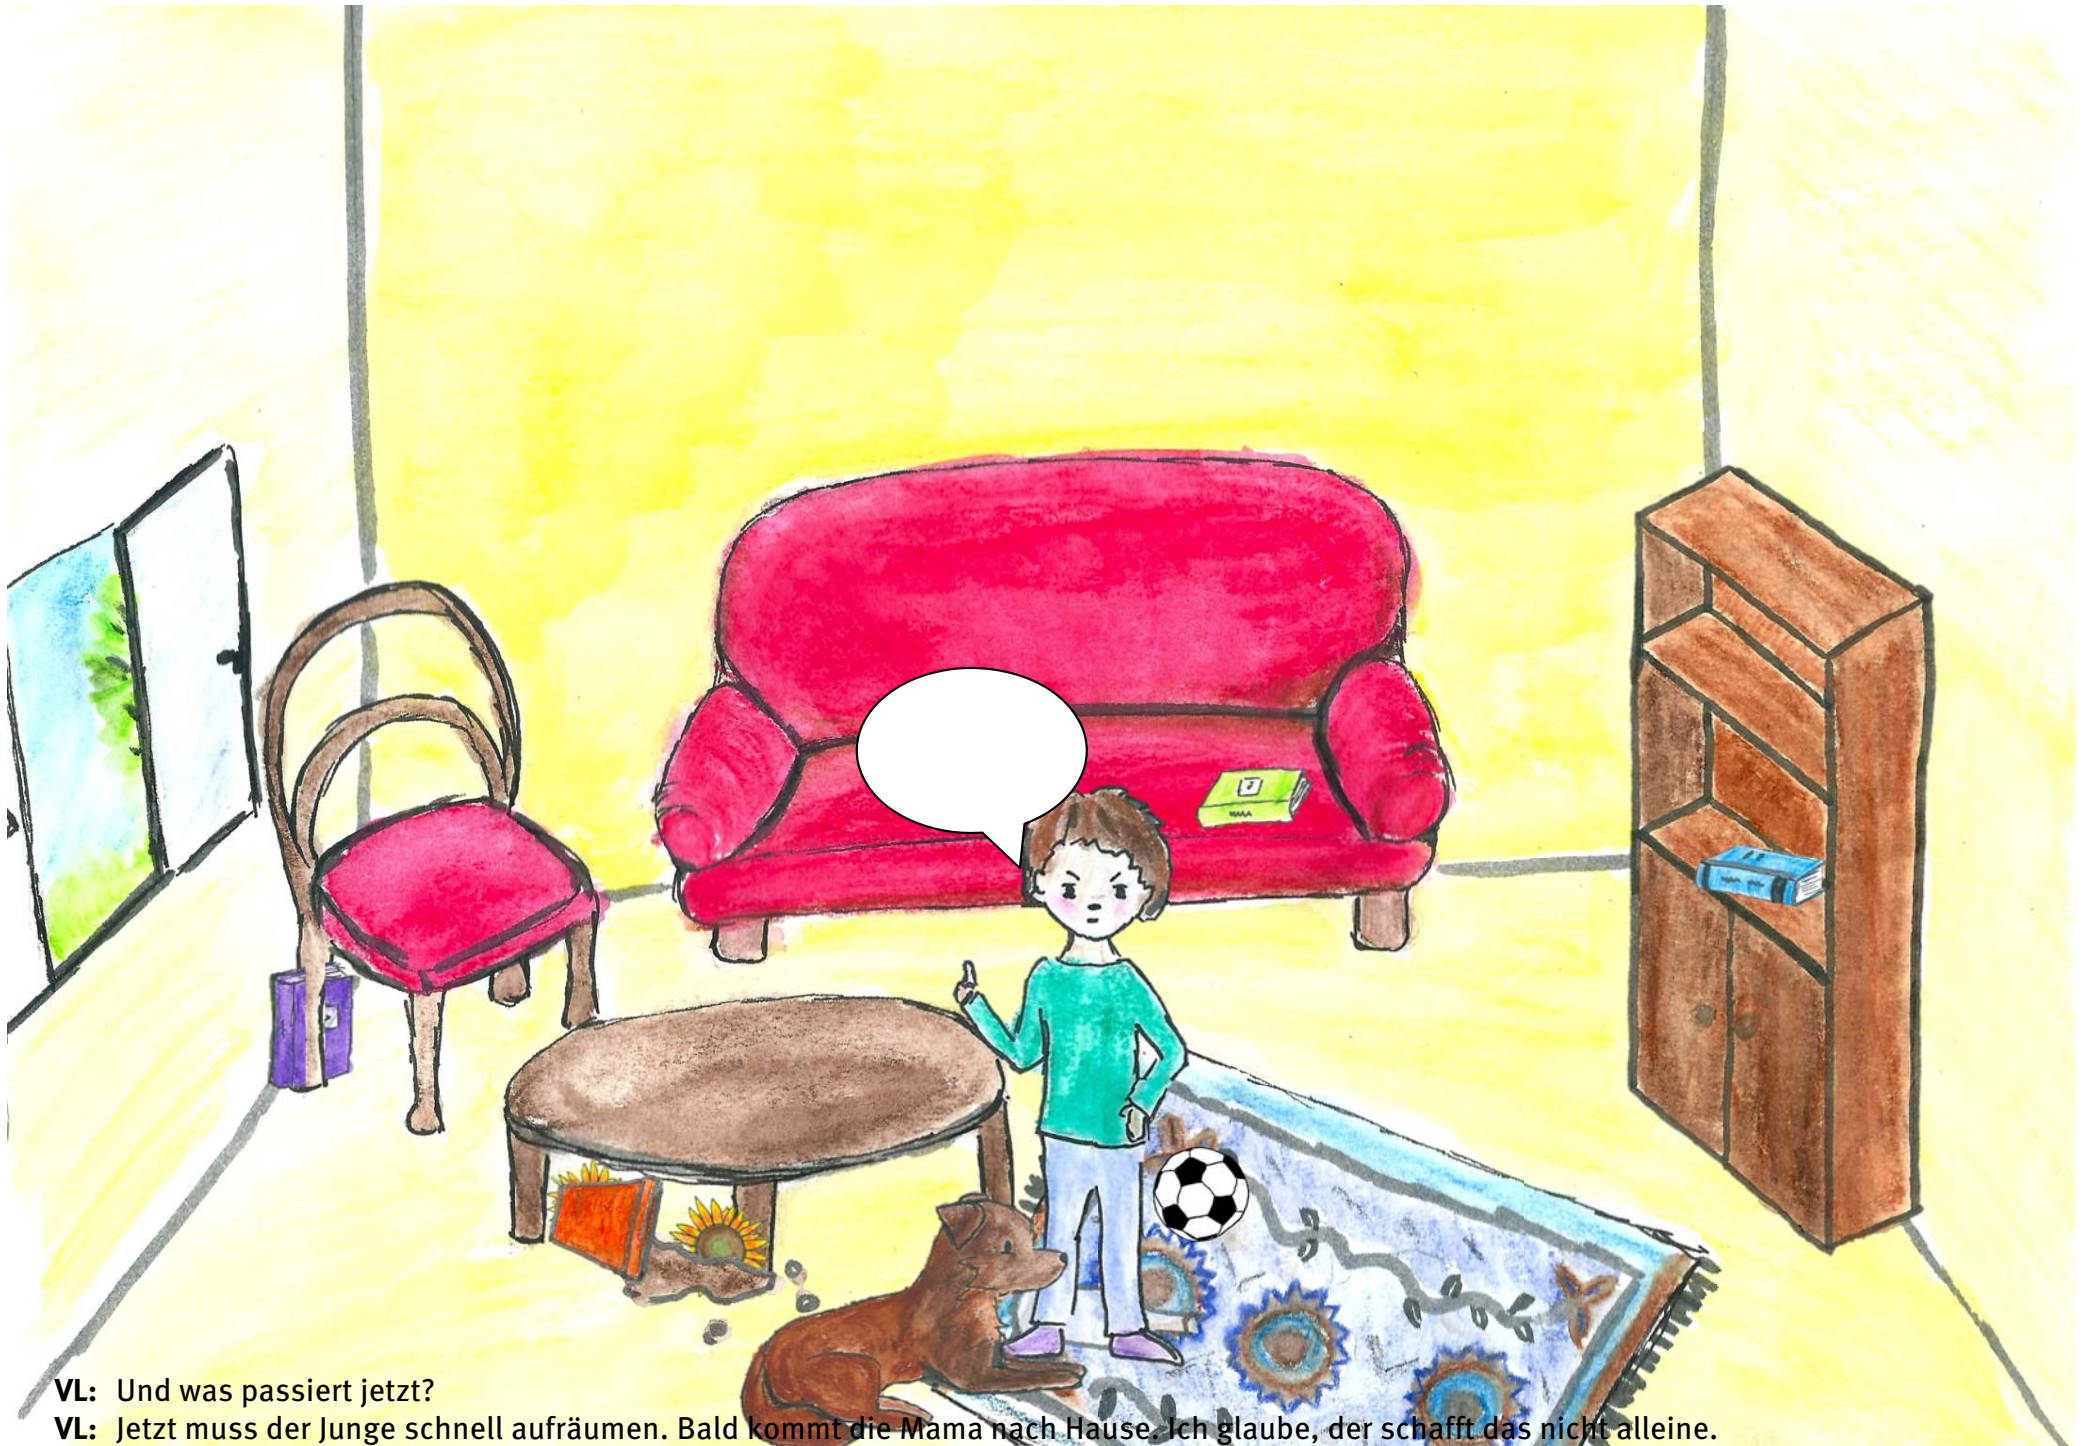

**VL:** Und was passiert jetzt?

**VL:** Jetzt muss der Junge schnell aufräumen. Bald kommt die Mama nach Hause. Ich glaube, der schafft das nicht alleine.  
Was kann man denn da tun?



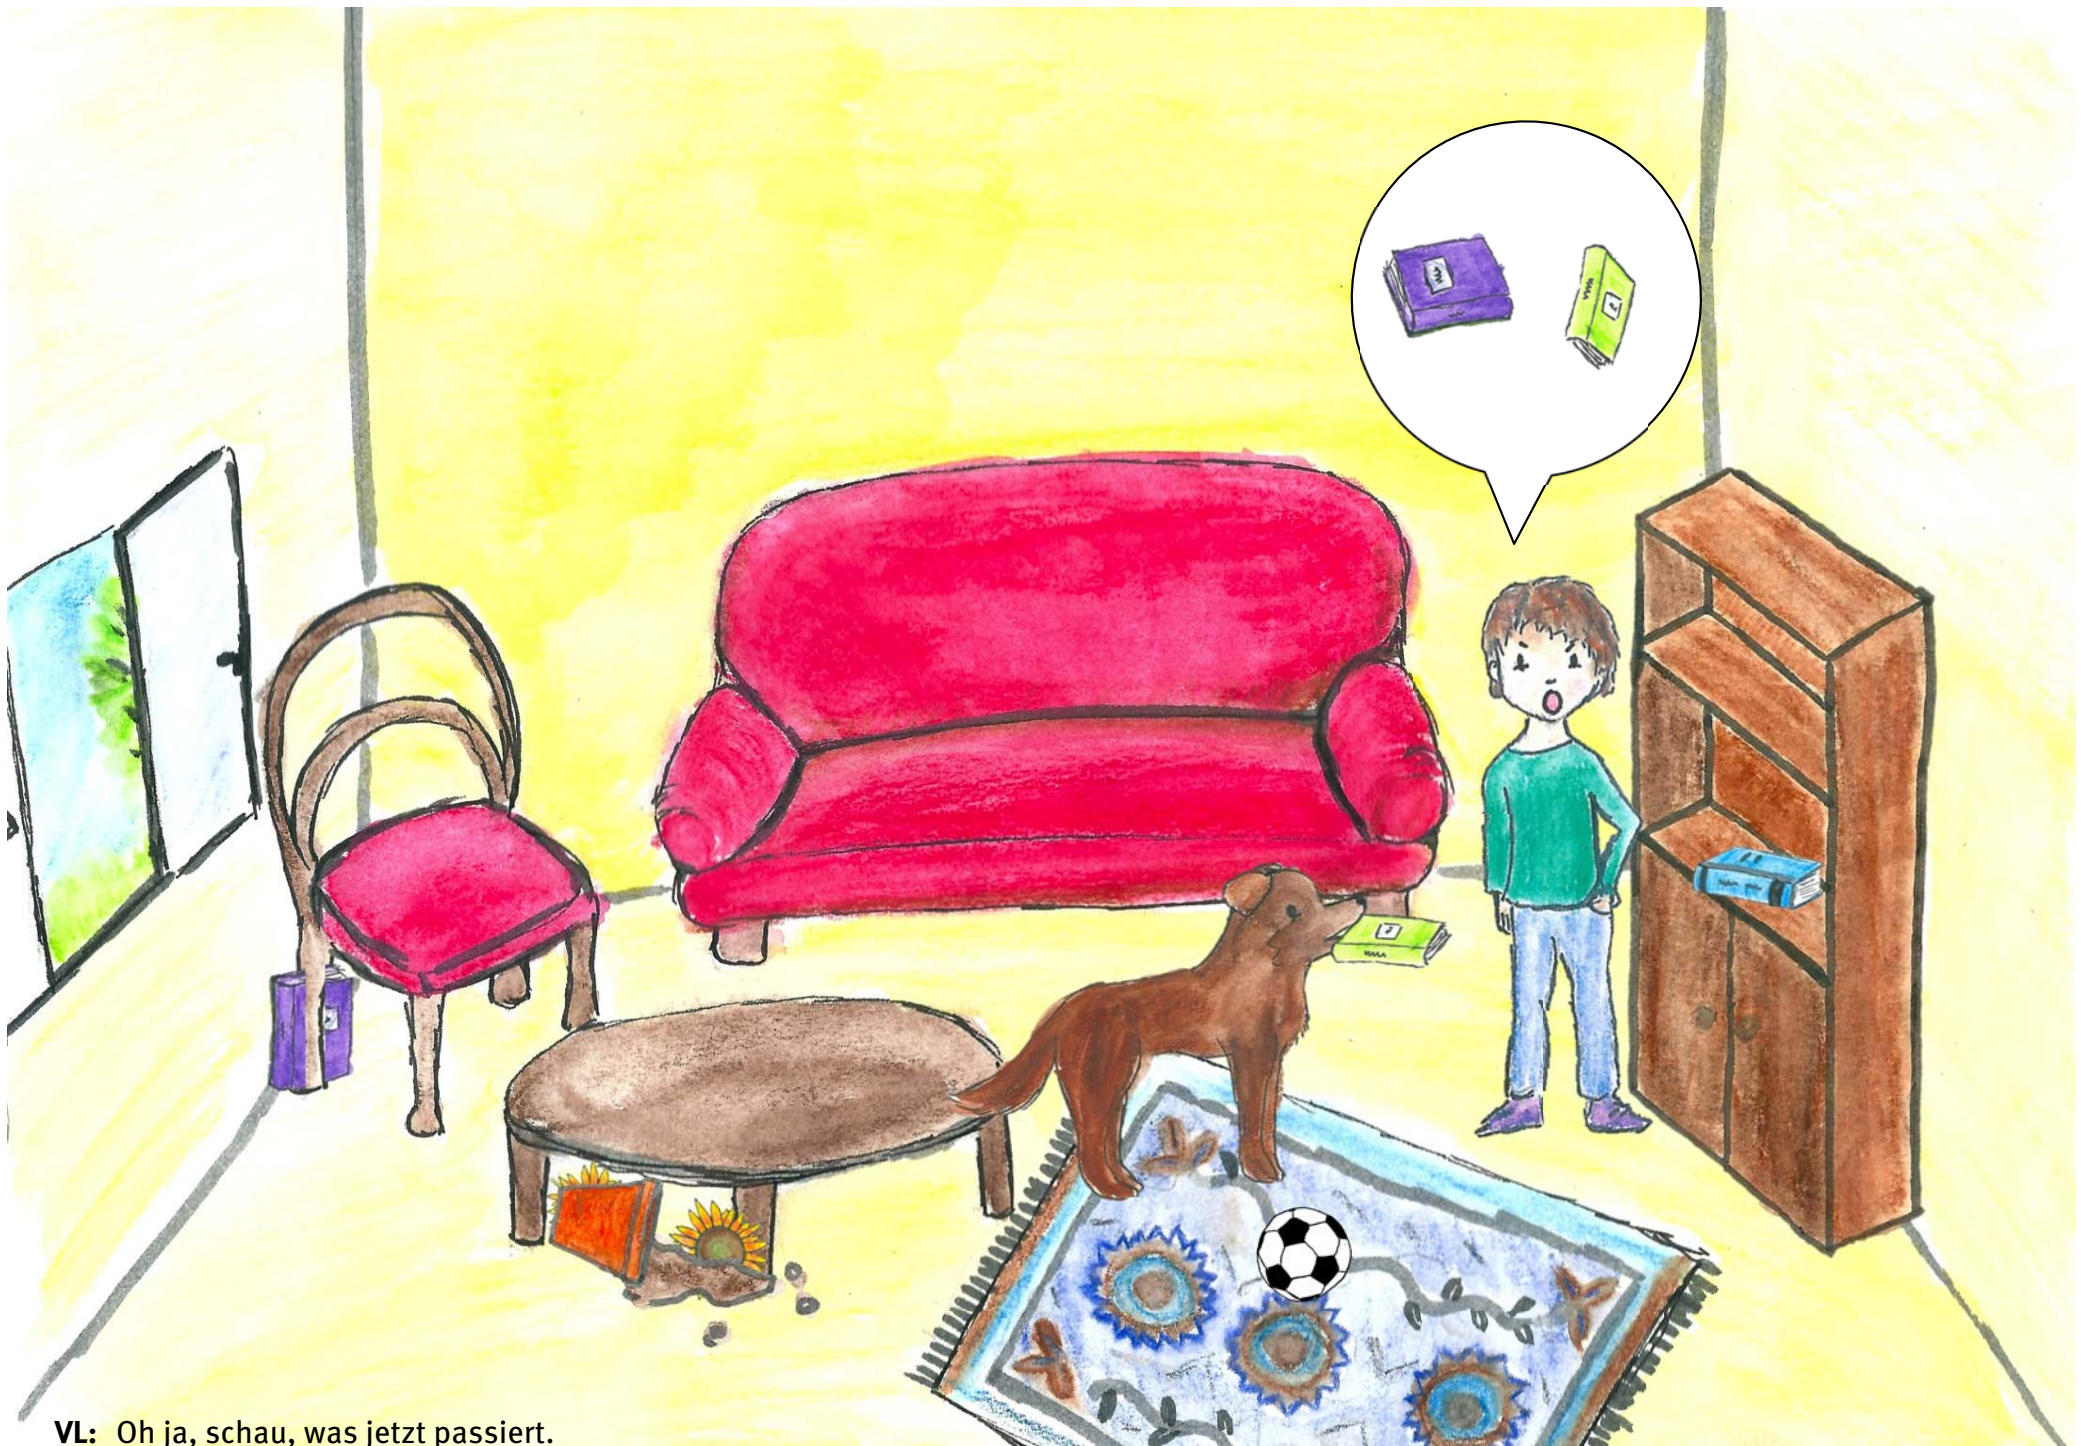

**VL:** Oh ja, schau, was jetzt passiert.

**NF:** Wem bringt der Hund ein Buch?



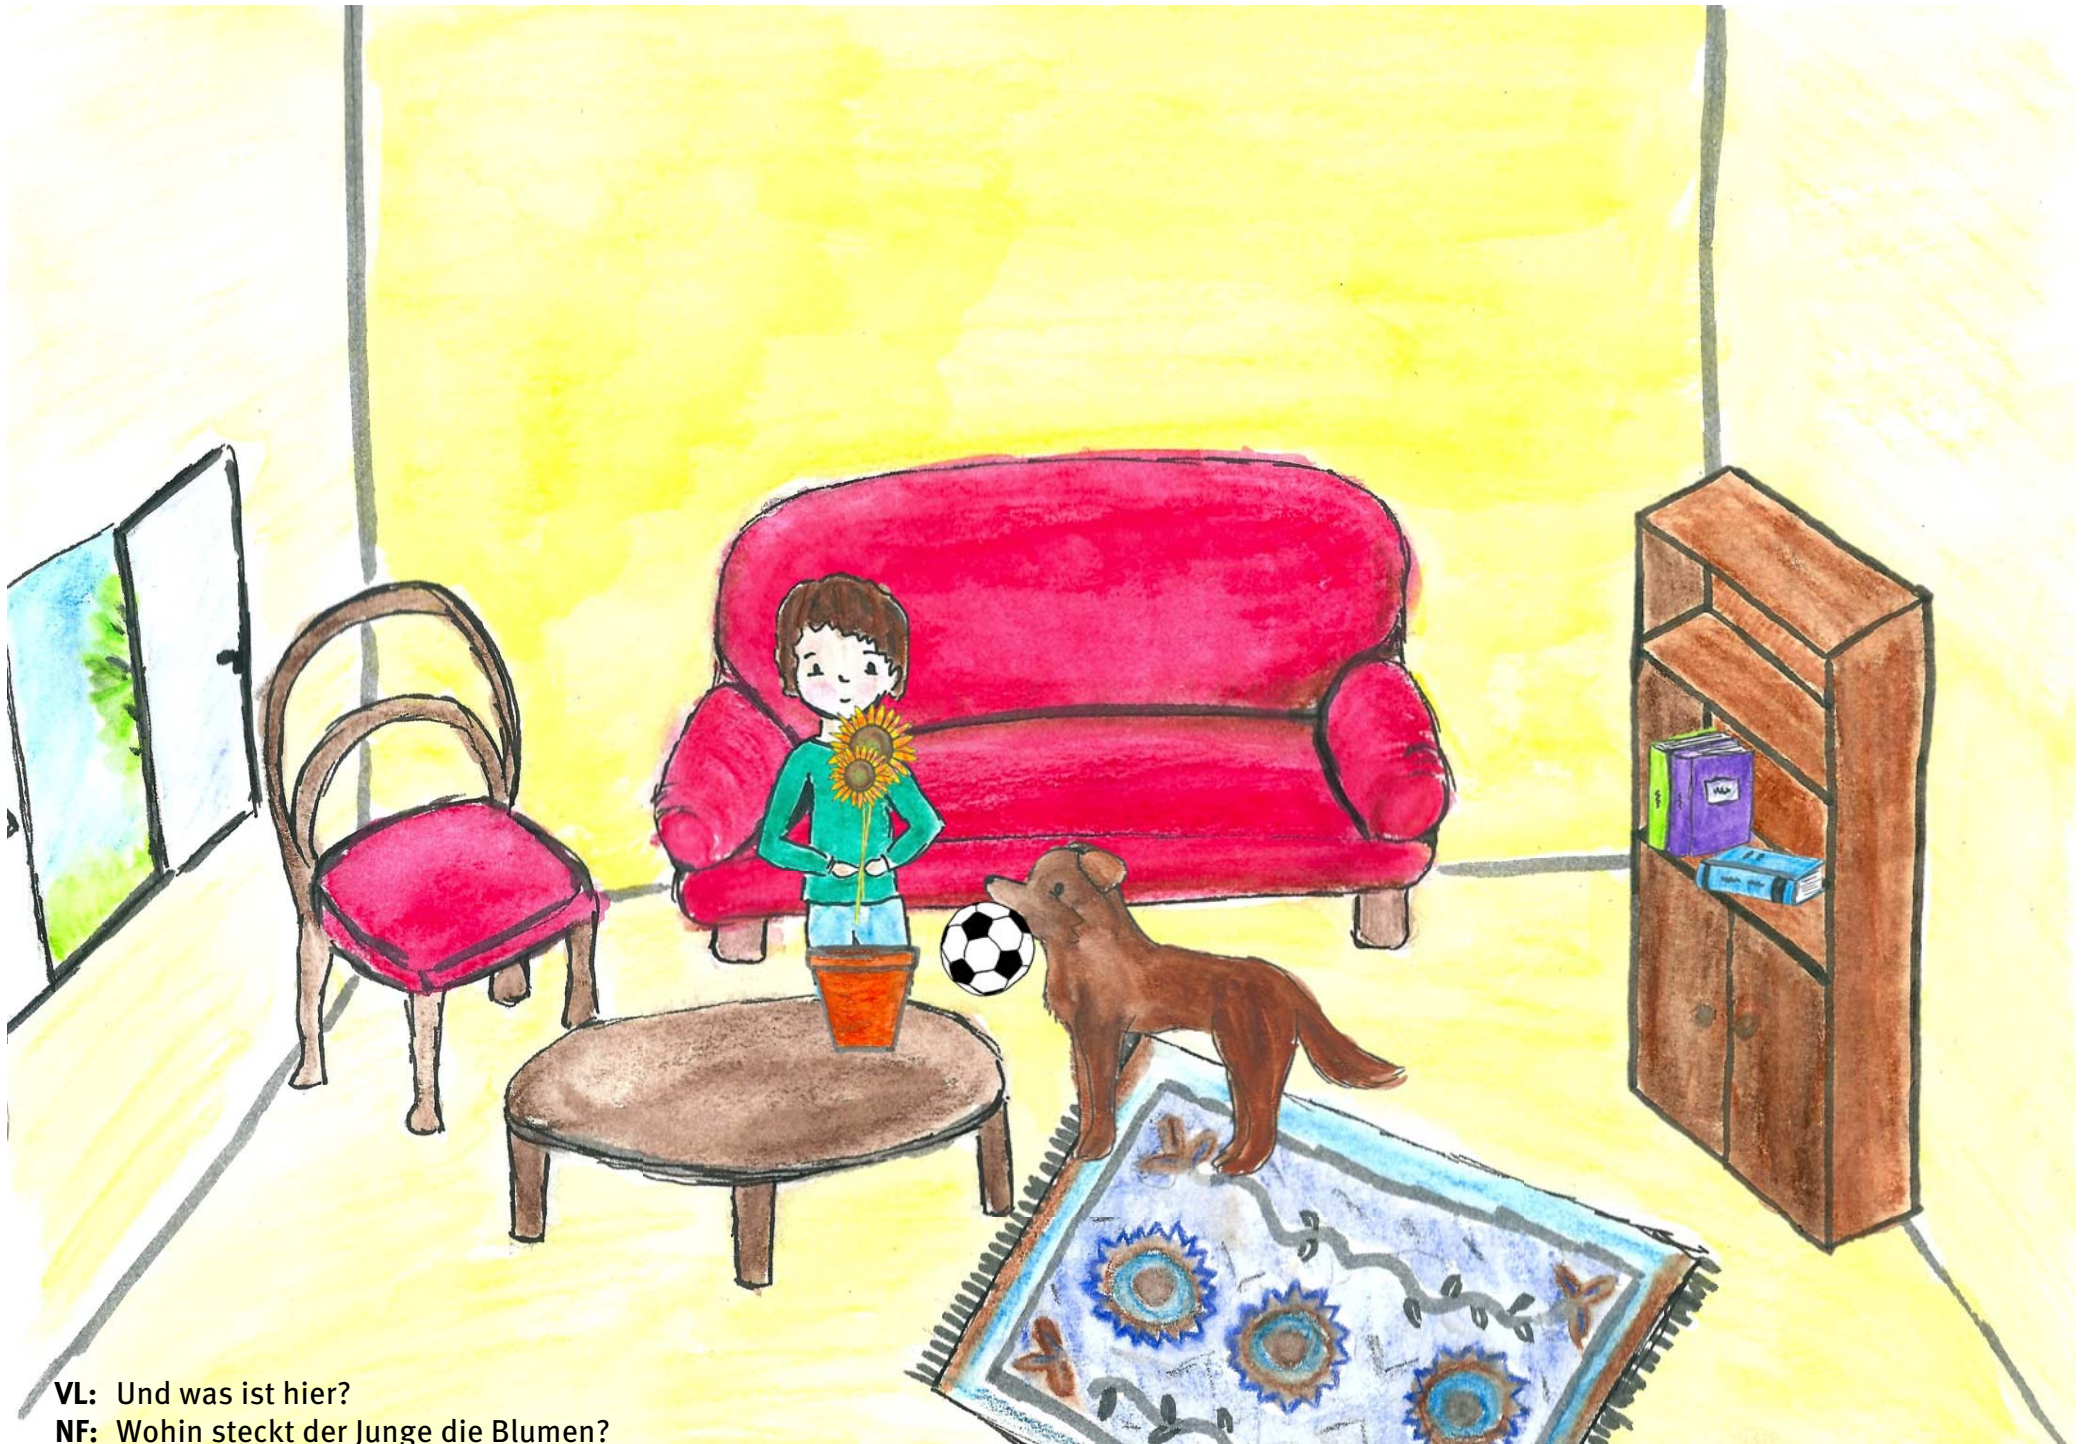

**VL:** Und was ist hier?

**NF:** Wohin steckt der Junge die Blumen?

**VL:** Was ist mit dem Hund los?



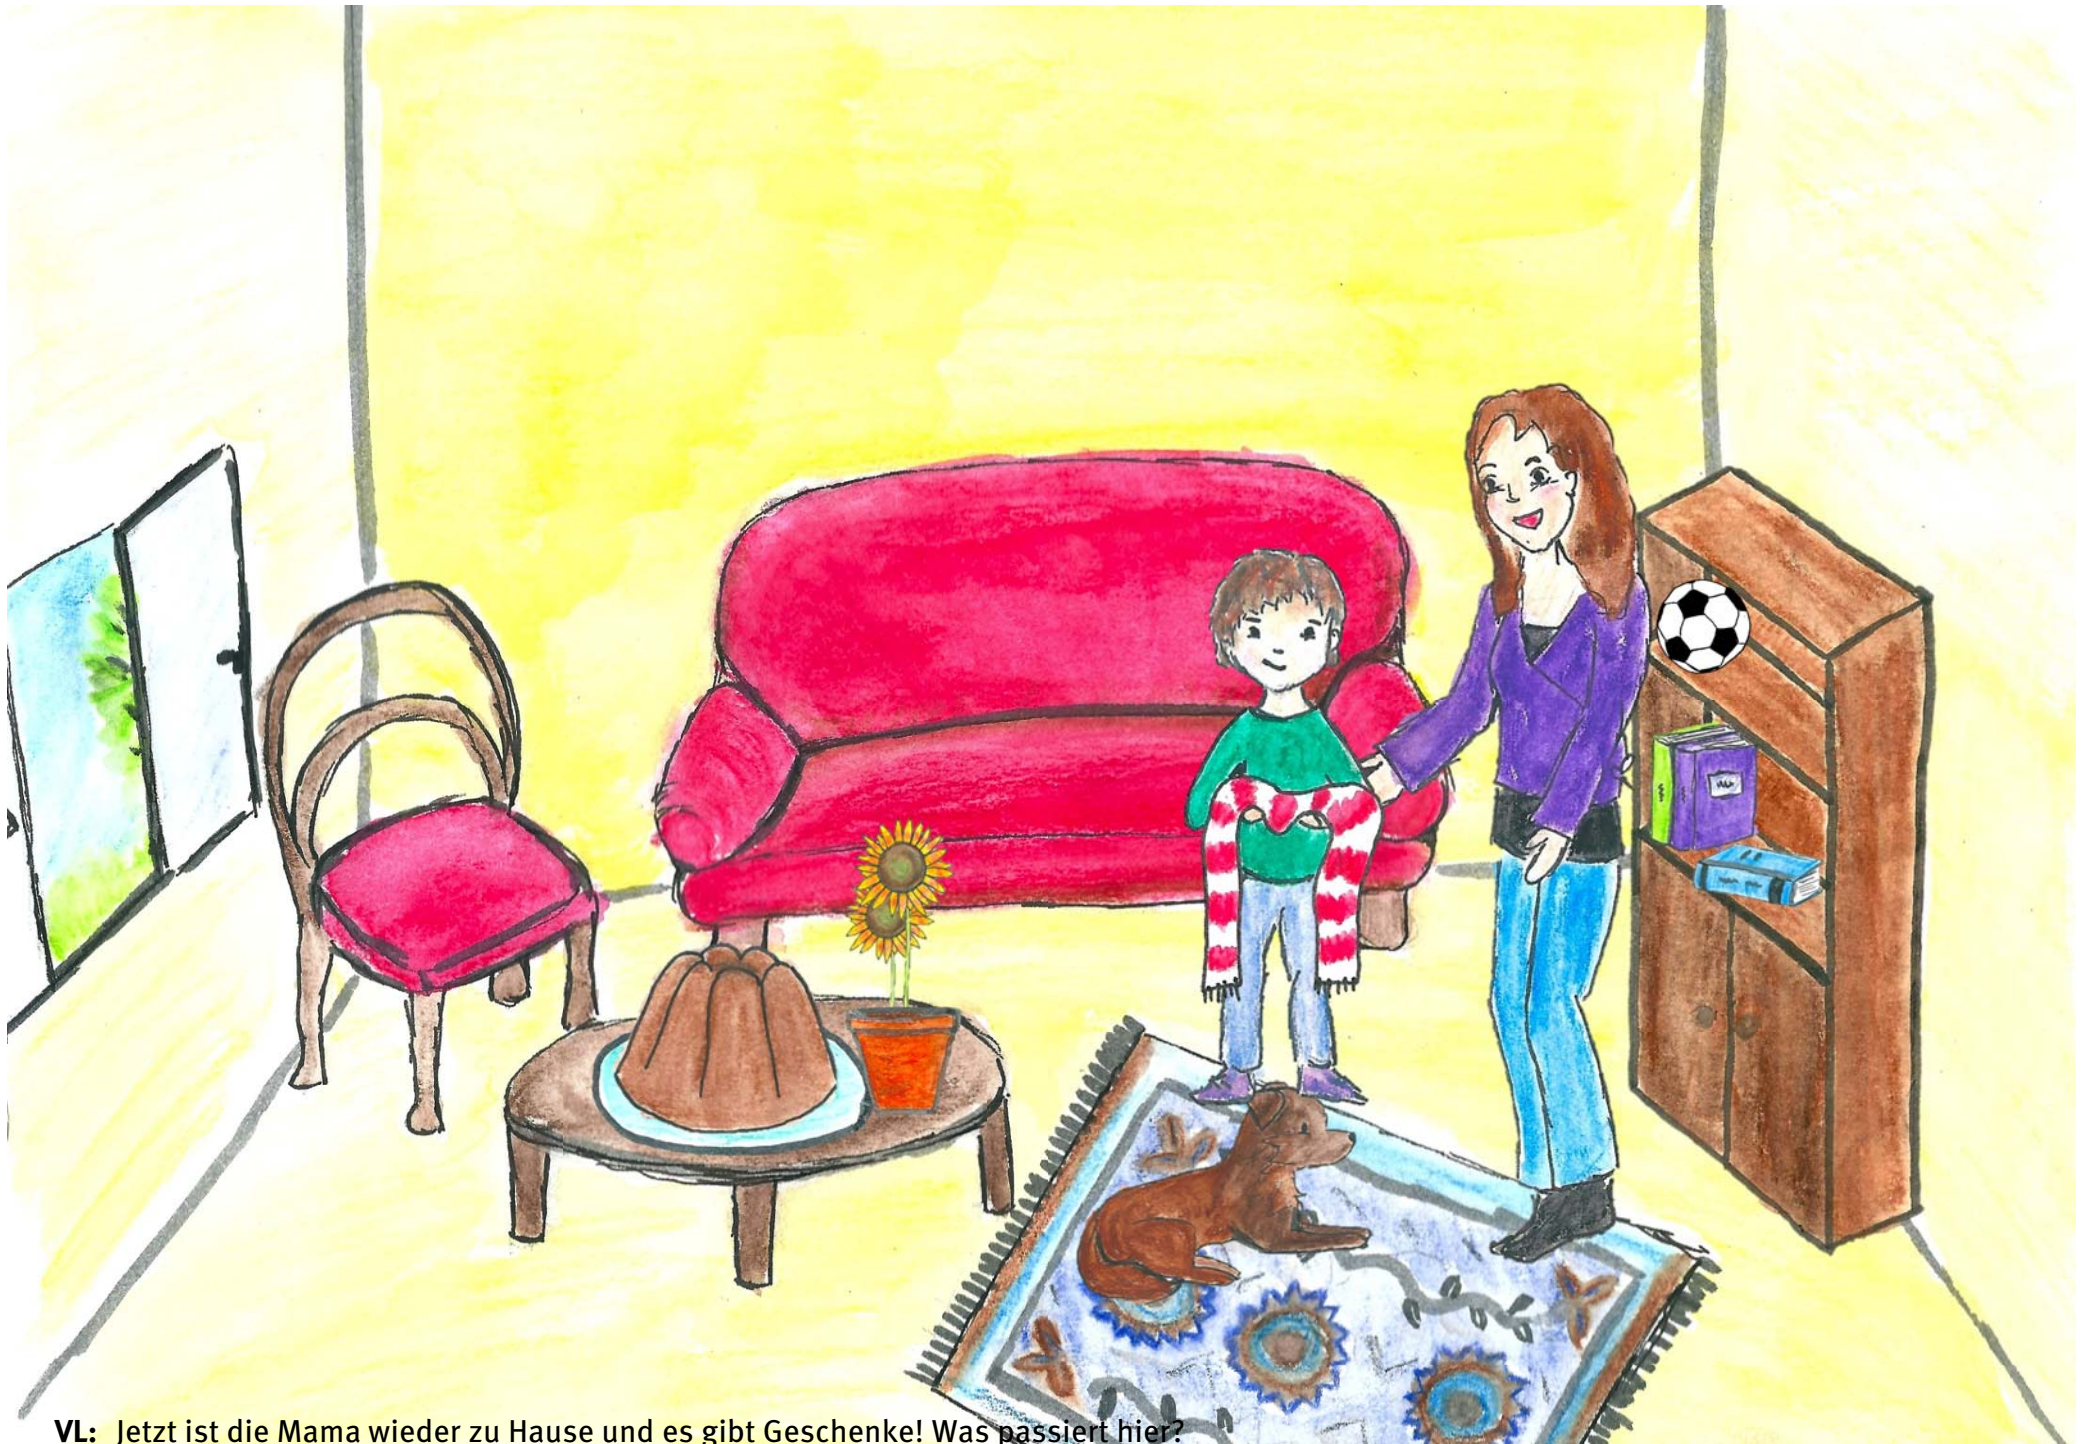

**VL:** Jetzt ist die Mama wieder zu Hause und es gibt Geschenke! Was passiert hier?

**P:** Wem gibt er den Schal?



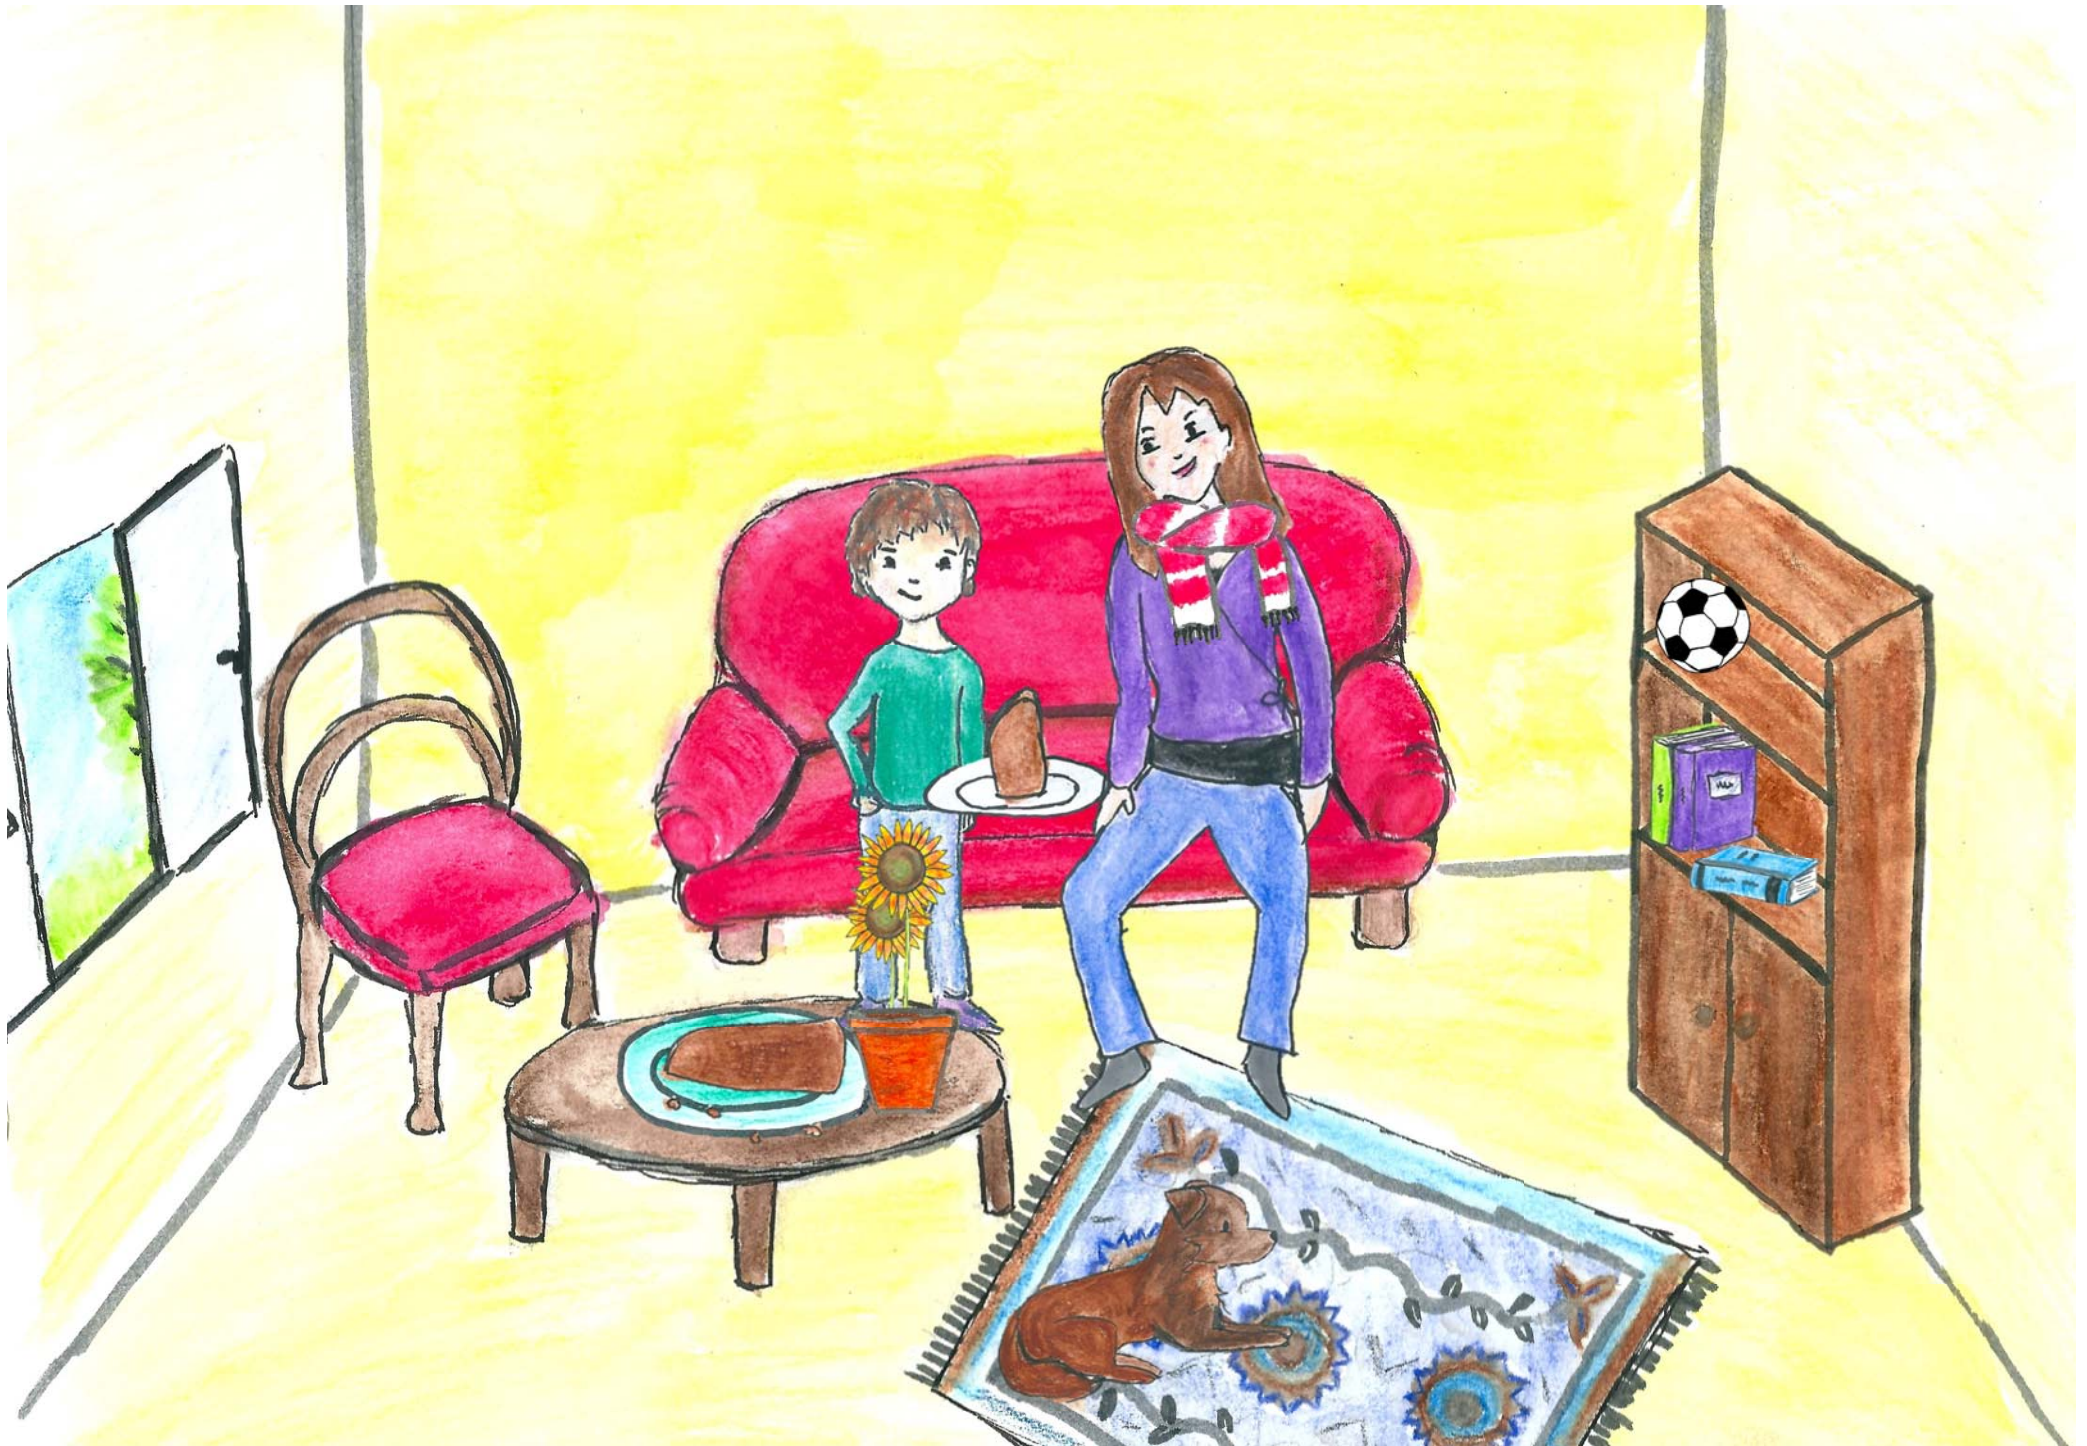



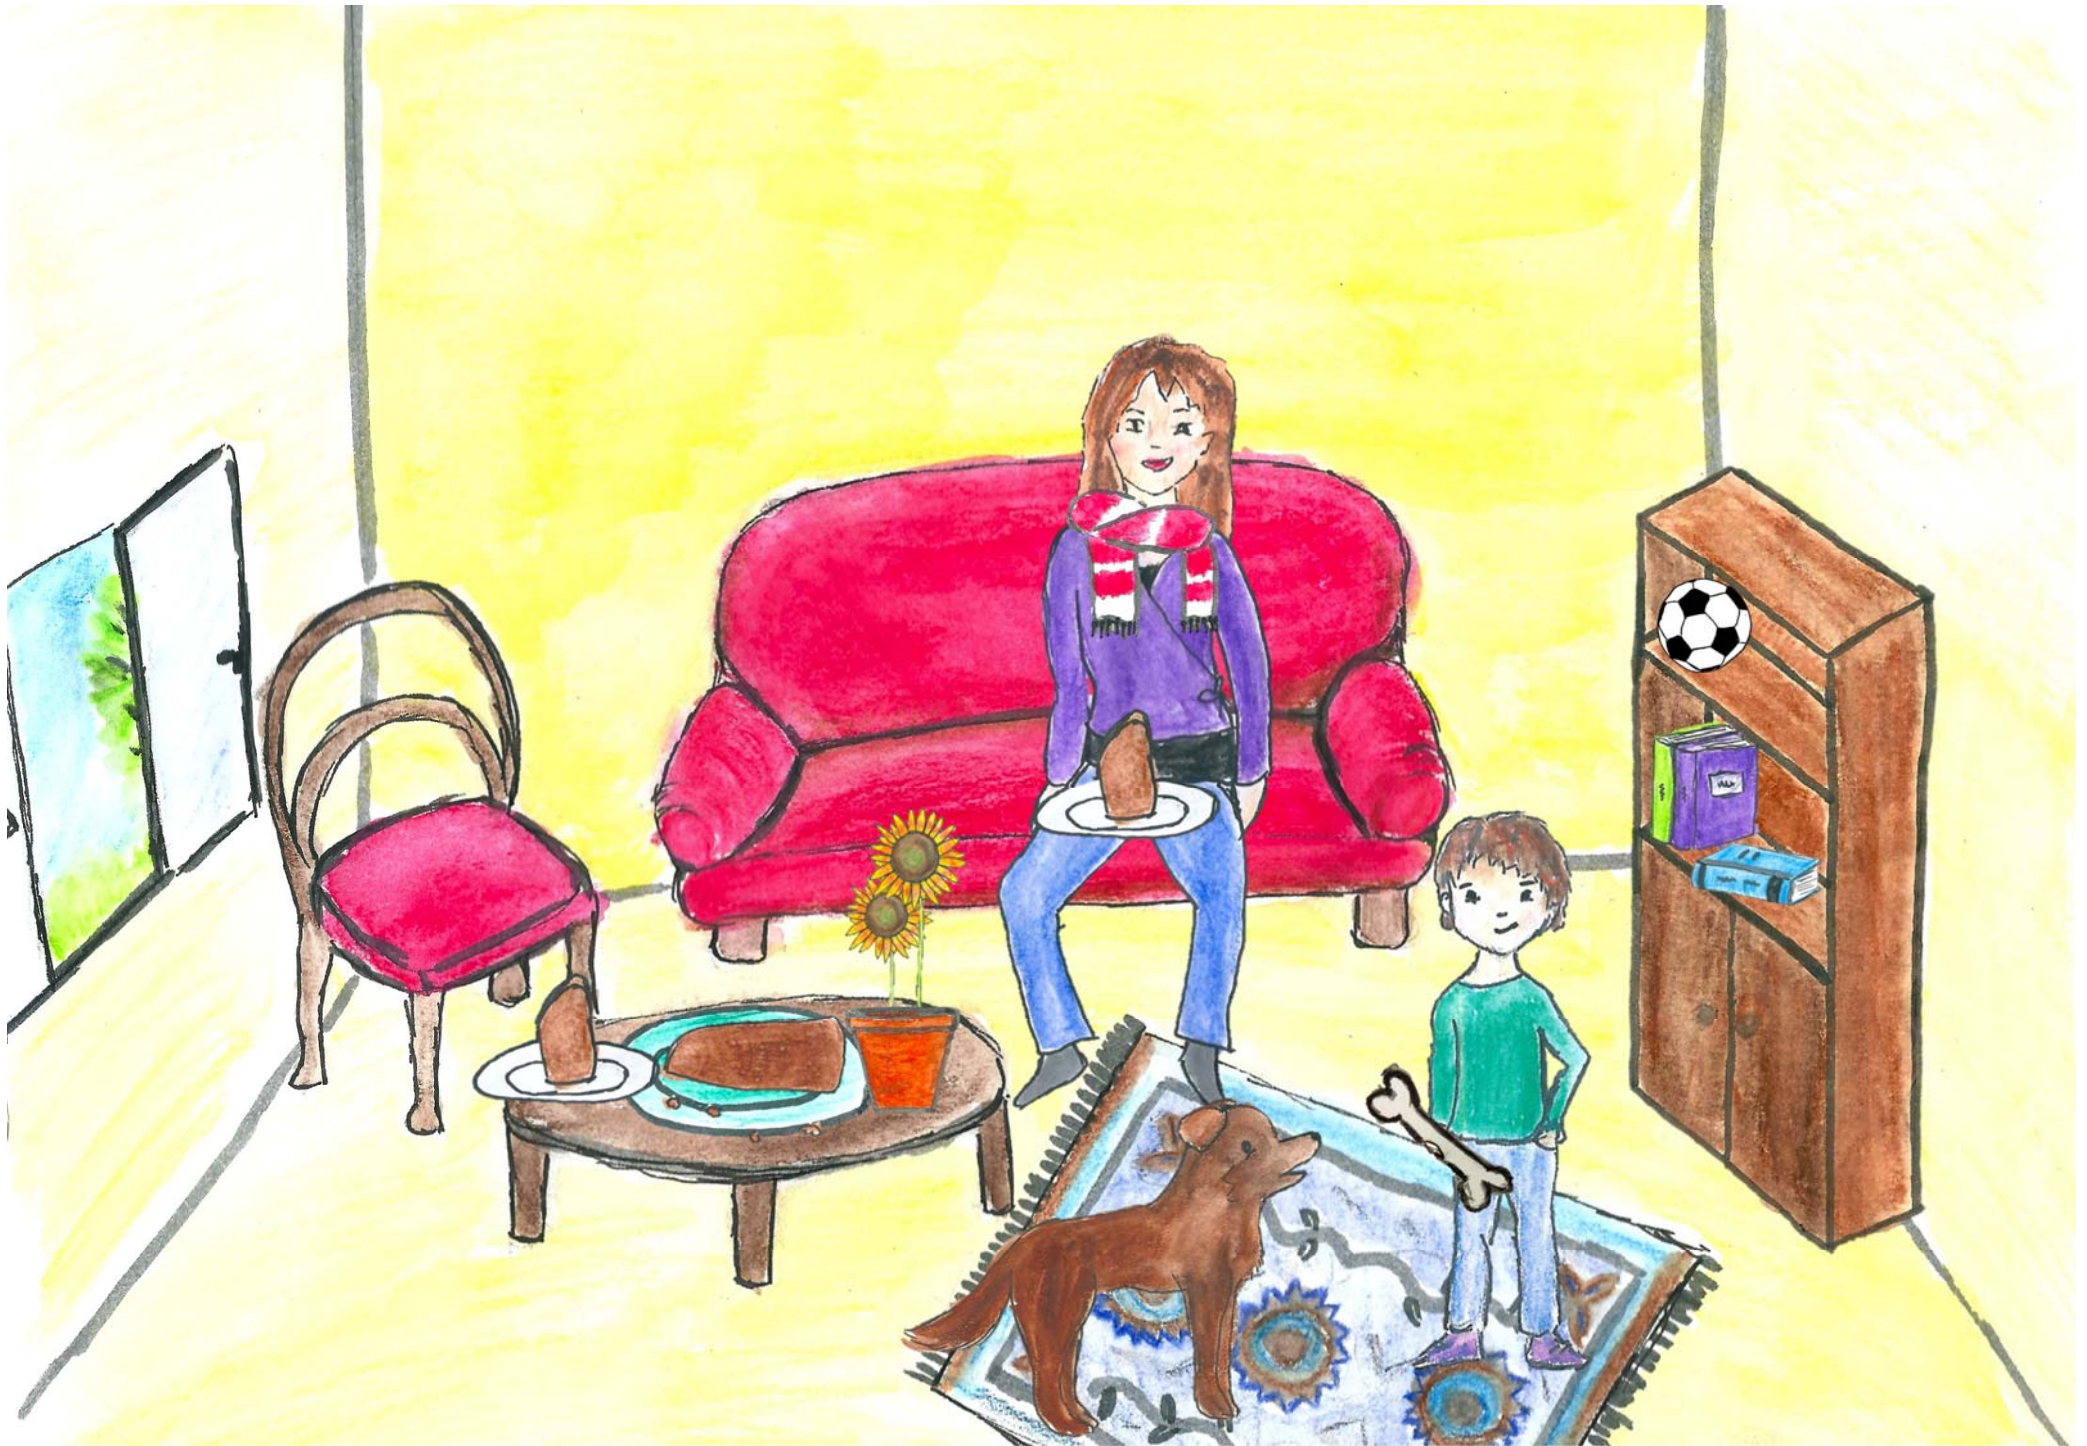

VL: Was ist hier los?



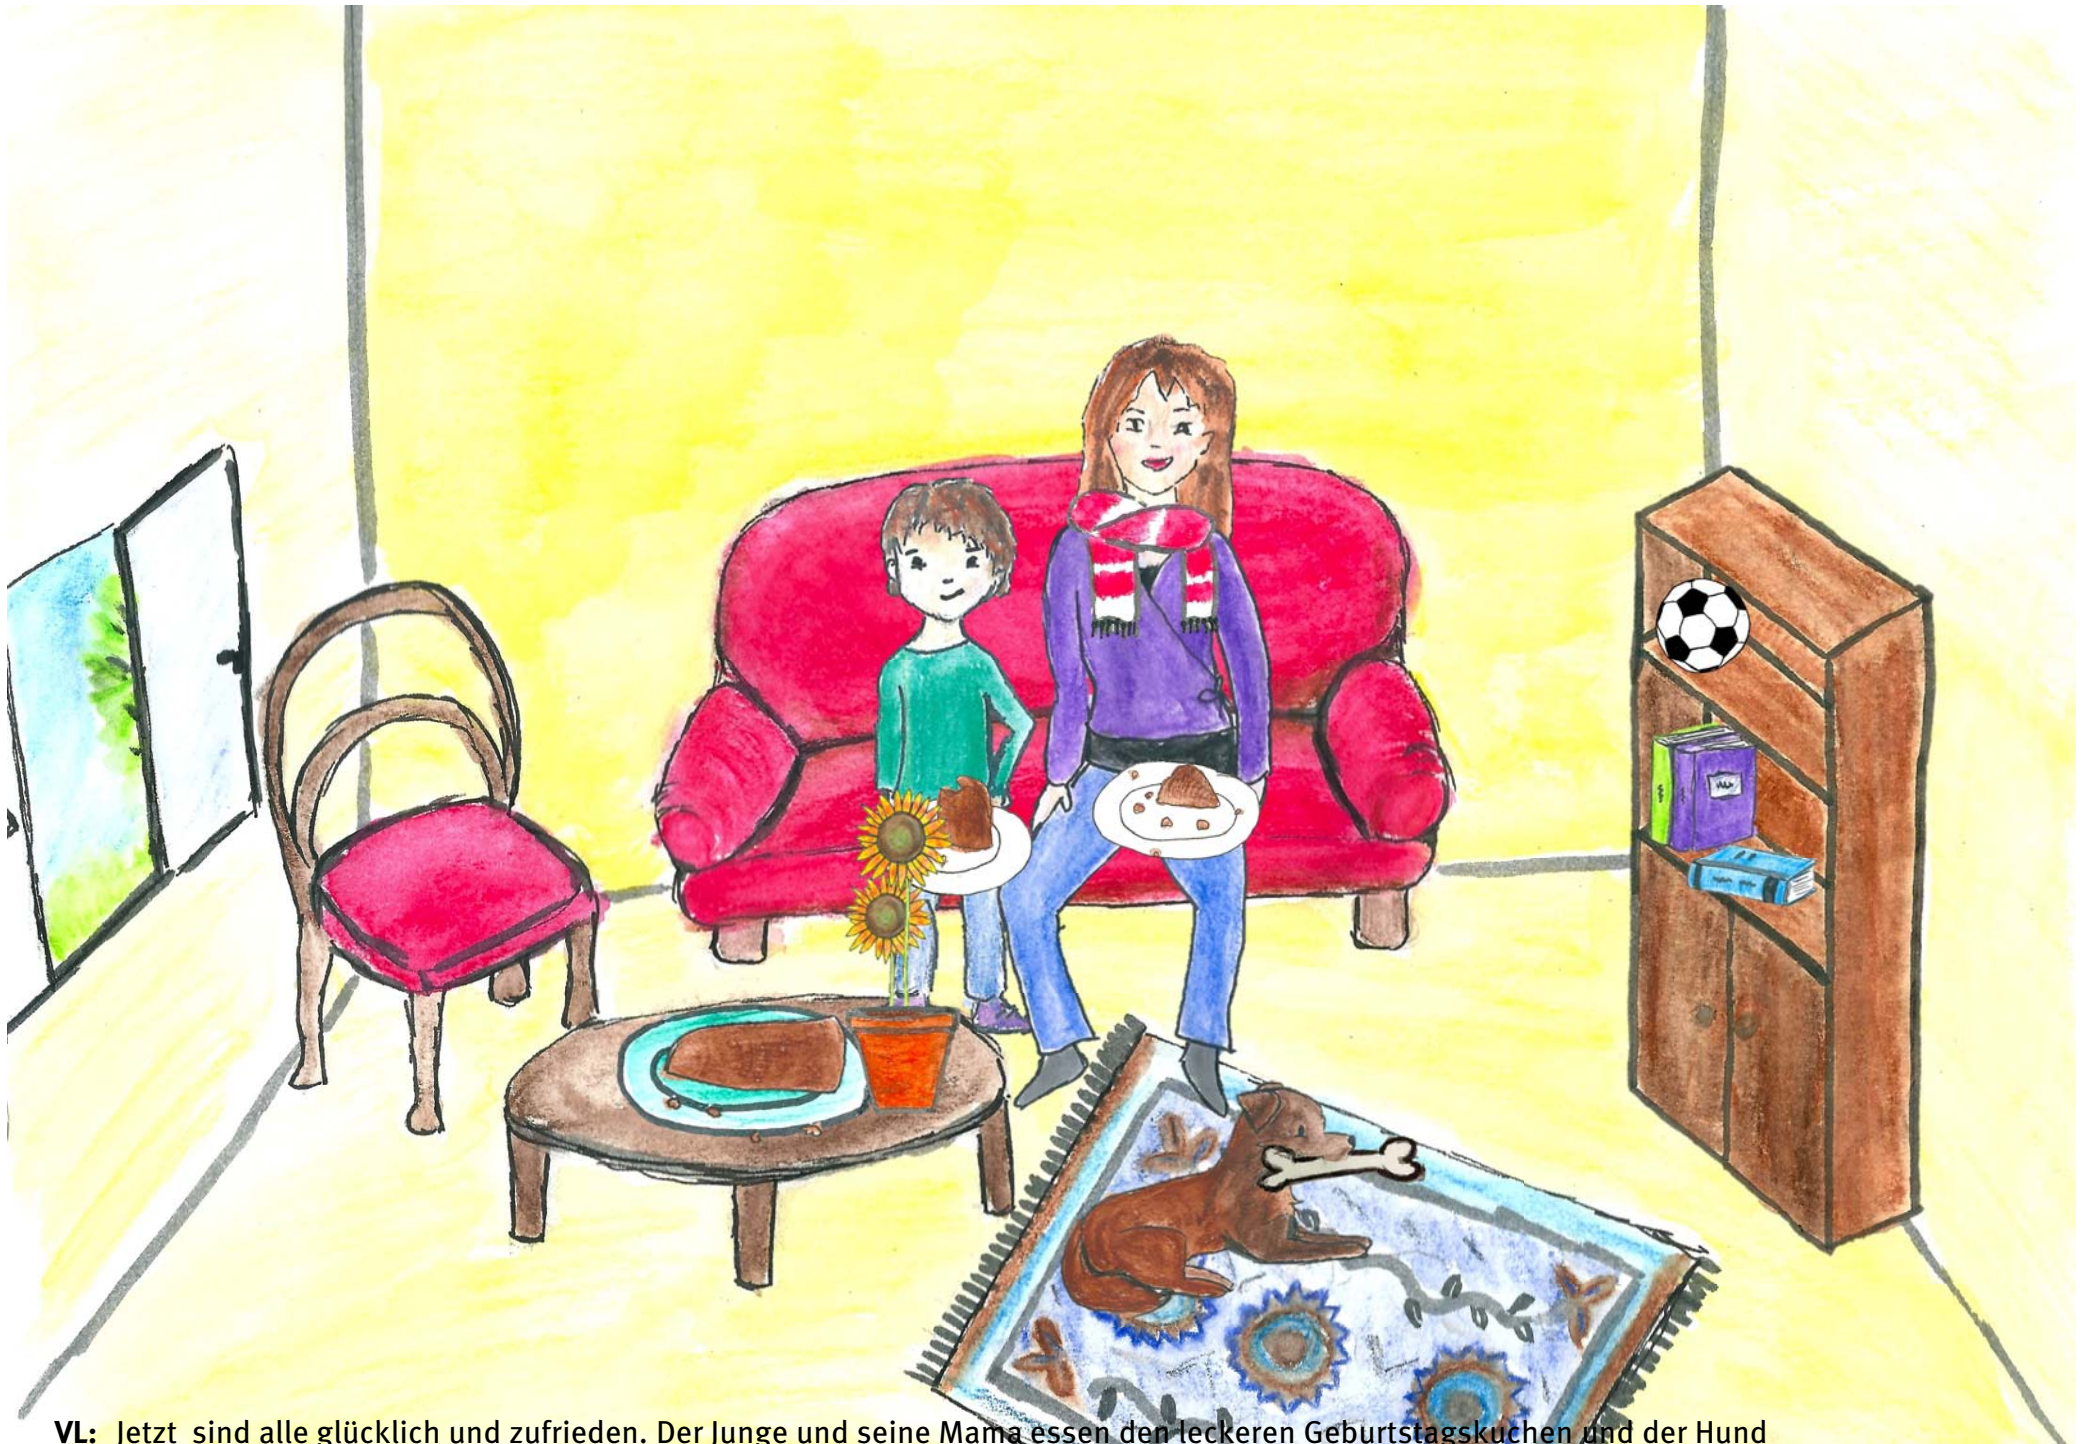

**VL:** Jetzt sind alle glücklich und zufrieden. Der Junge und seine Mama essen den leckeren Geburtstagskuchen und der Hund knabbert an seinem Knochen.
