# Supplementary material
Source: publisher site journal article supplement (https://www.degruyterbrill.com/publication/isbn/9783110645743/downloadAsset/9783110645743_Testmaterialien_KT-DEU.zip)

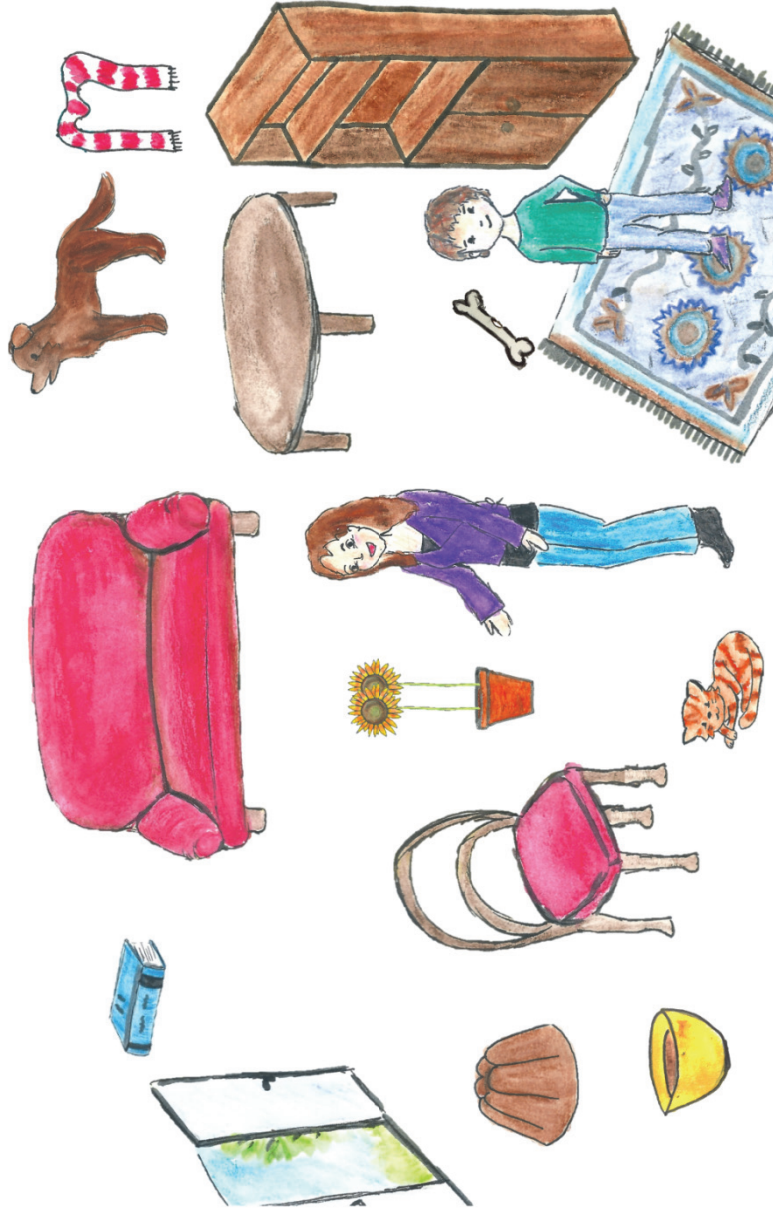

Supplement: Supplementary file 3 [file Mathieu_et_al_2020_KT-DEU_Eingangsblatt.pdf › Werthmann_KT-DEU/Mathieu_et_al_2020_KT-DEU_Eingangsblatt.pdf]
